# Supplementary material for: A new potential energy surface of the OH2+ system and state-to-state quantum dynamics studies of the O+ + H2 reaction
Source: Royal Society of Chemistry journal article supplement (doi:10.1039/c7cp03676k), 2017-12-13
Supplement: c7cp03676k1.pdf [file c7cp03676k1.pdf]

## Electronic Supplementary Information (ESI)

### “A New Potential Energy Surface of OH<sub>2</sub><sup>+</sup> System and State-to-State Quantum Dynamics Studies of the O<sup>+</sup>(<sup>4</sup>S) + H<sub>2</sub>(X<sup>1</sup>Σ<sub>g</sub><sup>+</sup>) → OH<sup>+</sup>(X<sup>3</sup>Σ<sup>-</sup>) + H(<sup>2</sup>S) Reaction”

Wentao Li,<sup>1,2,\*</sup> Jiuchuang Yuan,<sup>2</sup> Meiling Yuan,<sup>3</sup> Yong Zhang,<sup>4</sup> Minghai Yao,<sup>1</sup> Zhigang Sun<sup>2,\*</sup>

<sup>1</sup>Department of College Foundation Education, BoHai University, Jinzhou 121000, Liaoning China

<sup>2</sup>Center for Theoretical and Computational Chemistry and State Key Laboratory of Molecular Reaction Dynamics, Dalian Institute of Chemical Physics, Chinese Academy of Sciences, Dalian 116023, China

<sup>3</sup>Key Laboratory of Materials Modification by Beams of the Ministry of Education, School of Physics and Optoelectronic Technology, Dalian University of Technology, Dalian 116024, PR China

<sup>4</sup>Department of Physics, Tonghua Normal University, Tonghua 134002, Jilin China

### Long range interatomic potential energy figures

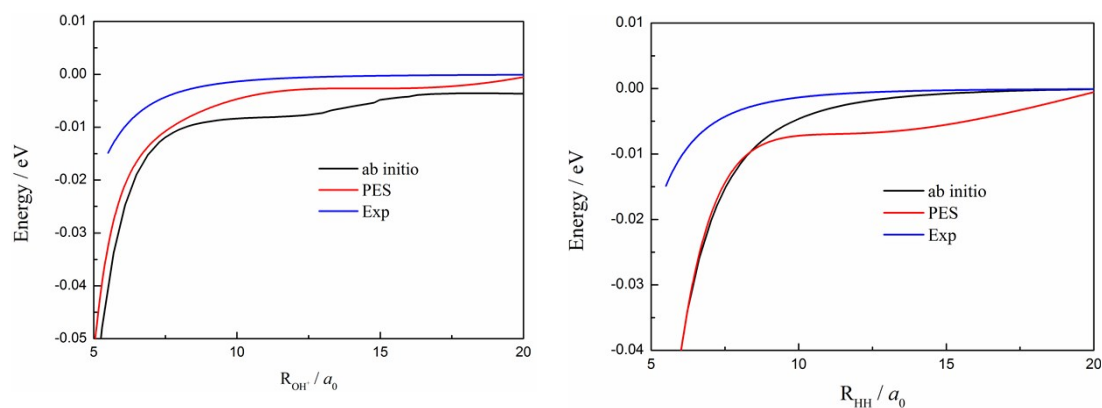

The left panel refers to the O<sup>+</sup> ion approach to the H<sub>2</sub> molecule and the right panel corresponds to the H atom close to the OH<sup>+</sup> ion.

### Total and vibrational integral cross section

---

\* Corresponding authors. E-mail: [wtlee1982@163.com](mailto:wtleee1982@163.com); [zsun@dicp.ac.cn](mailto:zsun@dicp.ac.cn)

| <b>Energy</b> | <b>Total</b> | <b>v'=0</b> | <b>v'=1</b> | <b>v'=2</b> | <b>v'=3</b> |
|---------------|--------------|-------------|-------------|-------------|-------------|
| 0.040         | 93.40953591  | 63.54635548 | 29.83580396 | --          | --          |
| 0.041         | 93.30195467  | 63.58440225 | 29.68699406 | --          | --          |
| 0.042         | 92.74917932  | 63.28661392 | 29.43219814 | --          | --          |
| 0.043         | 92.20773677  | 63.09004385 | 29.08812896 | --          | --          |
| 0.044         | 92.11819220  | 63.32864822 | 28.76103894 | --          | --          |
| 0.045         | 91.13849436  | 62.78666855 | 28.32567717 | --          | --          |
| 0.046         | 90.33968950  | 62.34933628 | 27.96575577 | --          | --          |
| 0.047         | 89.46493205  | 61.86390727 | 27.57705356 | --          | --          |
| 0.048         | 88.42466267  | 61.23319426 | 27.16826886 | --          | --          |
| 0.049         | 87.26586898  | 60.48717745 | 26.75573888 | --          | --          |
| 0.050         | 86.18116054  | 59.77445792 | 26.38340017 | --          | --          |
| 0.051         | 84.99891698  | 58.96073636 | 26.01416736 | --          | --          |
| 0.052         | 83.88600887  | 58.17631759 | 25.68517605 | --          | --          |
| 0.053         | 82.80631407  | 57.40830700 | 25.37361873 | --          | --          |
| 0.054         | 81.83179608  | 56.70148707 | 25.10661050 | --          | --          |
| 0.055         | 80.99024130  | 56.07055328 | 24.89711478 | --          | --          |
| 0.056         | 80.26097066  | 55.52751553 | 24.71220232 | --          | --          |
| 0.057         | 79.62556063  | 55.06330434 | 24.54230965 | --          | --          |
| 0.058         | 79.05858400  | 54.65790432 | 24.38178860 | --          | --          |
| 0.059         | 78.53400690  | 54.28996704 | 24.22584476 | --          | --          |
| 0.060         | 78.01009836  | 53.92496178 | 24.06715673 | --          | --          |
| 0.061         | 77.45595521  | 53.53697199 | 23.90079411 | --          | --          |
| 0.062         | 76.84172538  | 53.10025021 | 23.72276338 | --          | --          |
| 0.063         | 76.14892598  | 52.59819113 | 23.53135593 | --          | --          |

|       |             |             |             |    |    |
|-------|-------------|-------------|-------------|----|----|
| 0.064 | 75.37507340 | 52.02640927 | 23.32861657 | -- | -- |
| 0.065 | 74.52742686 | 51.38853934 | 23.11832061 | -- | -- |
| 0.066 | 73.62425909 | 50.69836163 | 22.90501470 | -- | -- |
| 0.067 | 72.69164576 | 49.97679958 | 22.69390044 | -- | -- |
| 0.068 | 71.75869737 | 49.24899481 | 22.48897904 | -- | -- |
| 0.069 | 70.85211504 | 48.53916098 | 22.29263465 | -- | -- |
| 0.070 | 69.99584956 | 47.87040744 | 22.10564519 | -- | -- |
| 0.071 | 69.20652691 | 47.26073737 | 21.92659373 | -- | -- |
| 0.072 | 68.49172655 | 46.72074056 | 21.75234183 | -- | -- |
| 0.073 | 67.85266324 | 46.25530868 | 21.57915087 | -- | -- |
| 0.074 | 67.28243011 | 45.86120060 | 21.40328597 | -- | -- |
| 0.075 | 66.76815253 | 45.52899719 | 21.22126055 | -- | -- |
| 0.076 | 66.29562868 | 45.24584129 | 21.03178266 | -- | -- |
| 0.077 | 65.84930749 | 44.99599842 | 20.83508860 | -- | -- |
| 0.078 | 65.42111856 | 44.76903886 | 20.63361061 | -- | -- |
| 0.079 | 64.99796643 | 44.54783417 | 20.43143907 | -- | -- |
| 0.080 | 64.56780736 | 44.31522380 | 20.23373855 | -- | -- |
| 0.081 | 64.12594171 | 44.06135145 | 20.04568834 | -- | -- |
| 0.082 | 63.67233361 | 43.78200137 | 19.87147360 | -- | -- |
| 0.083 | 63.21100819 | 43.47876513 | 19.71351237 | -- | -- |
| 0.084 | 62.74760824 | 43.15737299 | 19.57168843 | -- | -- |
| 0.085 | 62.28838975 | 42.82694634 | 19.44309849 | -- | -- |
| 0.086 | 61.83841517 | 42.49766870 | 19.32259032 | -- | -- |
| 0.087 | 61.39998620 | 42.17895432 | 19.20302991 | -- | -- |
| 0.088 | 60.97325706 | 41.87867429 | 19.07669535 | -- | -- |

|       |             |             |             |    |    |
|-------|-------------|-------------|-------------|----|----|
| 0.089 | 60.55505364 | 41.60083832 | 18.93640110 | -- | -- |
| 0.090 | 60.14005041 | 41.34583393 | 18.77644655 | -- | -- |
| 0.091 | 59.72178654 | 41.11013990 | 18.59391041 | -- | -- |
| 0.092 | 59.29348746 | 40.88676807 | 18.38902290 | -- | -- |
| 0.093 | 58.85010073 | 40.66725264 | 18.16521355 | -- | -- |
| 0.094 | 58.38915266 | 40.44283876 | 17.92876006 | -- | -- |
| 0.095 | 57.91149960 | 40.20636649 | 17.68765775 | -- | -- |
| 0.096 | 57.43324094 | 39.95362733 | 17.46218901 | -- | -- |
| 0.097 | 56.96324930 | 39.68395653 | 17.26185009 | -- | -- |
| 0.098 | 56.50287391 | 39.40055474 | 17.08475890 | -- | -- |
| 0.099 | 56.05991851 | 39.10970547 | 16.93241458 | -- | -- |
| 0.100 | 55.63966357 | 38.81919318 | 16.80231430 | -- | -- |
| 0.101 | 55.24499289 | 38.53707409 | 16.68931911 | -- | -- |
| 0.102 | 54.87605223 | 38.26985265 | 16.58712604 | -- | -- |
| 0.103 | 54.53026173 | 38.02122753 | 16.48953087 | -- | -- |
| 0.104 | 54.20255481 | 37.79182719 | 16.39091281 | -- | -- |
| 0.105 | 53.88585764 | 37.57870929 | 16.28720985 | -- | -- |
| 0.106 | 53.57311288 | 37.37692021 | 16.17636410 | -- | -- |
| 0.107 | 53.25793972 | 37.18012960 | 16.05834240 | -- | -- |
| 0.108 | 52.93659868 | 36.98225216 | 15.93547913 | -- | -- |
| 0.109 | 52.60892954 | 36.77893166 | 15.81192744 | -- | -- |
| 0.110 | 52.27827523 | 36.56808301 | 15.69305094 | -- | -- |
| 0.111 | 51.95059755 | 36.35007639 | 15.58435756 | -- | -- |
| 0.112 | 51.63361009 | 36.12774549 | 15.49064079 | -- | -- |
| 0.113 | 51.33452233 | 35.90504340 | 15.41506917 | -- | -- |

|       |             |             |             |    |    |
|-------|-------------|-------------|-------------|----|----|
| 0.114 | 51.05856479 | 35.68614061 | 15.35862607 | -- | -- |
| 0.115 | 50.80746258 | 35.47427400 | 15.31974223 | -- | -- |
| 0.116 | 50.57843605 | 35.27078814 | 15.29426568 | -- | -- |
| 0.117 | 50.36474079 | 35.07467158 | 15.27647192 | -- | -- |
| 0.118 | 50.15581880 | 34.88282524 | 15.25894457 | -- | -- |
| 0.119 | 49.93988137 | 34.69075868 | 15.23446523 | -- | -- |
| 0.120 | 49.70504648 | 34.49315276 | 15.19657572 | -- | -- |
| 0.121 | 49.44147409 | 34.28521954 | 15.14034306 | -- | -- |
| 0.122 | 49.14403422 | 34.06431494 | 15.06339448 | -- | -- |
| 0.123 | 48.81205300 | 33.82950861 | 14.96607878 | -- | -- |
| 0.124 | 48.45076308 | 33.58312932 | 14.85135220 | -- | -- |
| 0.125 | 48.06981625 | 33.32979667 | 14.72424986 | -- | -- |
| 0.126 | 47.68339967 | 33.07708064 | 14.59133753 | -- | -- |
| 0.127 | 47.30741153 | 32.83371366 | 14.45968362 | -- | -- |
| 0.128 | 46.95804373 | 32.60929749 | 14.33574670 | -- | -- |
| 0.129 | 46.64941106 | 32.41286629 | 14.22446428 | -- | -- |
| 0.130 | 46.39202112 | 32.25170462 | 14.12893051 | -- | -- |
| 0.131 | 46.19069340 | 32.13019087 | 14.04948987 | -- | -- |
| 0.132 | 46.04416426 | 32.04902609 | 13.98413236 | -- | -- |
| 0.133 | 45.94425912 | 32.00400707 | 13.92889683 | -- | -- |
| 0.134 | 45.87667106 | 31.98641711 | 13.87825850 | -- | -- |
| 0.135 | 45.82175287 | 31.98275355 | 13.82617671 | -- | -- |
| 0.136 | 45.75720215 | 31.97639138 | 13.76710254 | -- | -- |
| 0.137 | 45.65995013 | 31.94901195 | 13.69641395 | -- | -- |
| 0.138 | 45.50939071 | 31.88291955 | 13.61131171 | -- | -- |

|       |             |             |             |    |    |
|-------|-------------|-------------|-------------|----|----|
| 0.139 | 45.29048184 | 31.76399346 | 13.51095462 | -- | -- |
| 0.140 | 44.99614002 | 31.58398837 | 13.39654103 | -- | -- |
| 0.141 | 44.63259186 | 31.34261189 | 13.27458668 | -- | -- |
| 0.142 | 44.22294107 | 31.04815276 | 13.15986435 | -- | -- |
| 0.143 | 43.77418557 | 30.71760127 | 13.04231245 | -- | -- |
| 0.144 | 43.31332340 | 30.37411393 | 12.92568565 | -- | -- |
| 0.145 | 42.87072442 | 30.04389963 | 12.81405112 | -- | -- |
| 0.146 | 42.47915408 | 29.75740626 | 12.70964044 | -- | -- |
| 0.147 | 42.15483306 | 29.53016351 | 12.61307382 | -- | -- |
| 0.148 | 41.90726268 | 29.37158342 | 12.52439192 | -- | -- |
| 0.149 | 41.73724128 | 29.28267349 | 12.44336351 | -- | -- |
| 0.150 | 41.63387611 | 29.25257909 | 12.36995735 | -- | -- |
| 0.151 | 41.57631069 | 29.26029294 | 12.30435546 | -- | -- |
| 0.152 | 41.53820087 | 29.27921485 | 12.24686695 | -- | -- |
| 0.153 | 41.49269835 | 29.28208487 | 12.19796940 | -- | -- |
| 0.154 | 41.41692662 | 29.24581259 | 12.15794952 | -- | -- |
| 0.155 | 41.29587696 | 29.15577526 | 12.12649040 | -- | -- |
| 0.156 | 41.12567230 | 29.00875684 | 12.10298746 | -- | -- |
| 0.157 | 40.91295155 | 28.81306276 | 12.08581276 | -- | -- |
| 0.158 | 40.67370654 | 28.58689812 | 12.07276713 | -- | -- |
| 0.159 | 40.42932584 | 28.35459432 | 12.06089811 | -- | -- |
| 0.160 | 40.20187729 | 28.14155609 | 12.04683903 | -- | -- |
| 0.161 | 40.00965797 | 27.96922541 | 12.02739789 | -- | -- |
| 0.162 | 39.86314216 | 27.85089352 | 11.99970482 | -- | -- |
| 0.163 | 39.76260150 | 27.78895619 | 11.96158362 | -- | -- |

|       |             |             |             |    |    |
|-------|-------------|-------------|-------------|----|----|
| 0.164 | 39.69865323 | 27.77480222 | 11.91221738 | -- | -- |
| 0.165 | 39.65417942 | 27.79087355 | 11.85201716 | -- | -- |
| 0.166 | 39.60734758 | 27.81363422 | 11.78267366 | -- | -- |
| 0.167 | 39.53690339 | 27.81891752 | 11.70710389 | -- | -- |
| 0.168 | 39.42588624 | 27.78602073 | 11.62906725 | -- | -- |
| 0.169 | 39.26508041 | 27.70145808 | 11.55285946 | -- | -- |
| 0.170 | 39.05424707 | 27.56060416 | 11.48289583 | -- | -- |
| 0.171 | 38.80200557 | 27.36813439 | 11.42314383 | -- | -- |
| 0.172 | 38.52352819 | 27.13596168 | 11.37687927 | -- | -- |
| 0.173 | 38.23755458 | 26.88062287 | 11.34631107 | -- | -- |
| 0.174 | 37.96218248 | 26.61939018 | 11.33225995 | -- | -- |
| 0.175 | 37.71229005 | 26.36754042 | 11.33431480 | -- | -- |
| 0.176 | 37.49730799 | 26.13648247 | 11.35047983 | -- | -- |
| 0.177 | 37.31996764 | 25.93209288 | 11.37759111 | -- | -- |
| 0.178 | 37.17767941 | 25.75620152 | 11.41121583 | -- | -- |
| 0.179 | 37.06412567 | 25.60762205 | 11.44621471 | -- | -- |
| 0.180 | 36.97166646 | 25.48418811 | 11.47711640 | -- | -- |
| 0.181 | 36.89347287 | 25.38440208 | 11.49859902 | -- | -- |
| 0.182 | 36.82537459 | 25.30872629 | 11.50604826 | -- | -- |
| 0.183 | 36.76581713 | 25.25900567 | 11.49608702 | -- | -- |
| 0.184 | 36.71582408 | 25.23802283 | 11.46698034 | -- | -- |
| 0.185 | 36.67700404 | 25.24729663 | 11.41883931 | -- | -- |
| 0.186 | 36.64998032 | 25.28534466 | 11.35378423 | -- | -- |
| 0.187 | 36.63242563 | 25.34623935 | 11.27542282 | -- | -- |
| 0.188 | 36.61780776 | 25.41863290 | 11.18856718 | -- | -- |

|       |             |             |             |            |    |
|-------|-------------|-------------|-------------|------------|----|
| 0.189 | 36.59554109 | 25.48667163 | 11.09847199 | --         | -- |
| 0.190 | 36.55570807 | 25.53173038 | 11.01260939 | 0.00121583 | -- |
| 0.191 | 36.48773101 | 25.53511714 | 10.93803899 | 0.00467729 | -- |
| 0.192 | 36.36900400 | 25.48104893 | 10.87131465 | 0.00698339 | -- |
| 0.193 | 36.19004571 | 25.35987469 | 10.81252897 | 0.00819009 | -- |
| 0.194 | 35.94853219 | 25.16985046 | 10.76018754 | 0.00919579 | -- |
| 0.195 | 35.65012348 | 24.91827270 | 10.71149219 | 0.01115439 | -- |
| 0.196 | 35.30629097 | 24.62065202 | 10.66326110 | 0.01320709 | -- |
| 0.197 | 34.93578358 | 24.29880713 | 10.61271830 | 0.01506432 | -- |
| 0.198 | 34.56171507 | 23.97783683 | 10.55793252 | 0.01668157 | -- |
| 0.199 | 34.20863357 | 23.68281127 | 10.49837138 | 0.01807917 | -- |
| 0.200 | 33.89927296 | 23.43533601 | 10.43514626 | 0.01928419 | -- |
| 0.201 | 33.65209865 | 23.25093516 | 10.37099704 | 0.02050716 | -- |
| 0.202 | 33.48089385 | 23.13723872 | 10.31001042 | 0.02382211 | -- |
| 0.203 | 33.38838977 | 23.09372363 | 10.25682111 | 0.02785526 | -- |
| 0.204 | 33.37048254 | 23.11234079 | 10.21594465 | 0.03204138 | -- |
| 0.205 | 33.41639265 | 23.17911116 | 10.19077602 | 0.03619116 | -- |
| 0.206 | 33.50984946 | 23.27631143 | 10.18283874 | 0.04023970 | -- |
| 0.207 | 33.63127268 | 23.38493761 | 10.19159549 | 0.04415356 | -- |
| 0.208 | 33.75939200 | 23.48671624 | 10.21408313 | 0.04790499 | -- |
| 0.209 | 33.87367649 | 23.56597374 | 10.24546854 | 0.05147368 | -- |
| 0.210 | 33.95604047 | 23.61072236 | 10.27967195 | 0.05484472 | -- |
| 0.211 | 33.99228334 | 23.61321804 | 10.31025600 | 0.05800272 | -- |
| 0.212 | 33.97271117 | 23.56990969 | 10.33110035 | 0.06092678 | -- |
| 0.213 | 33.89539832 | 23.48117982 | 10.33756078 | 0.06595560 | -- |



|       |             |             |             |            |    |
|-------|-------------|-------------|-------------|------------|----|
| 0.214 | 33.75876127 | 23.35056692 | 10.32674128 | 0.07086532 | -- |
| 0.215 | 33.56730696 | 23.18385807 | 10.29777091 | 0.07524839 | -- |
| 0.216 | 33.33002186 | 22.98875384 | 10.25189384 | 0.07914642 | -- |
| 0.217 | 33.05893782 | 22.77421295 | 10.19207518 | 0.08266447 | -- |
| 0.218 | 32.76901487 | 22.55095481 | 10.12241329 | 0.08593843 | -- |
| 0.219 | 32.47328118 | 22.32706280 | 10.04768363 | 0.08912536 | -- |
| 0.220 | 32.18528927 | 22.11100710 | 9.97278522  | 0.09239220 | -- |
| 0.221 | 31.91786289 | 21.91083437 | 9.90232536  | 0.09588808 | -- |
| 0.222 | 31.68232504 | 21.73384345 | 9.84019224  | 0.09972622 | -- |
| 0.223 | 31.48772316 | 21.58592648 | 9.78945086  | 0.10397767 | -- |
| 0.224 | 31.33984277 | 21.47058604 | 9.75234101  | 0.10867171 | -- |
| 0.225 | 31.24075261 | 21.38867614 | 9.73007824  | 0.11380310 | -- |
| 0.226 | 31.18872557 | 21.33811093 | 9.72305915  | 0.11933888 | -- |
| 0.227 | 31.17844845 | 21.31427363 | 9.73064124  | 0.12524066 | -- |
| 0.228 | 31.20143241 | 21.31007471 | 9.75118256  | 0.13177300 | -- |
| 0.229 | 31.24615175 | 21.31663327 | 9.78216059  | 0.13883950 | -- |
| 0.230 | 31.29930388 | 21.32429455 | 9.82014483  | 0.14624756 | -- |
| 0.231 | 31.34699808 | 21.32351954 | 9.86081838  | 0.15398139 | -- |
| 0.232 | 31.37625125 | 21.30590335 | 9.89953896  | 0.16211741 | -- |
| 0.233 | 31.37643246 | 21.26549926 | 9.93155735  | 0.17072365 | -- |
| 0.234 | 31.34015981 | 21.19928777 | 9.95248467  | 0.17982389 | -- |
| 0.235 | 31.26446119 | 21.10762636 | 9.95901332  | 0.18938679 | -- |
| 0.236 | 31.15064929 | 20.99400324 | 9.94904009  | 0.19932936 | -- |
| 0.237 | 31.00447319 | 20.86458561 | 9.92226353  | 0.20952347 | -- |
| 0.238 | 30.83435197 | 20.72667328 | 9.87996130  | 0.21980107 | -- |

|       |             |             |            |            |    |
|-------|-------------|-------------|------------|------------|----|
| 0.239 | 30.65044071 | 20.58758906 | 9.82513758 | 0.22998286 | -- |
| 0.240 | 30.46297550 | 20.45364404 | 9.76189734 | 0.23988440 | -- |
| 0.241 | 30.28035878 | 20.32863962 | 9.69499810 | 0.24934641 | -- |
| 0.242 | 30.10856399 | 20.21372900 | 9.62938466 | 0.25824363 | -- |
| 0.243 | 29.95327115 | 20.10741923 | 9.57230243 | 0.26650196 | -- |
| 0.244 | 29.81191145 | 20.00618421 | 9.52472109 | 0.27410690 | -- |
| 0.245 | 29.68095411 | 19.90576182 | 9.48732651 | 0.28110063 | -- |
| 0.246 | 29.55771418 | 19.80244320 | 9.45934459 | 0.28927568 | -- |
| 0.247 | 29.43857388 | 19.69425047 | 9.43888117 | 0.29887946 | -- |
| 0.248 | 29.31933612 | 19.58192581 | 9.42315906 | 0.30774378 | -- |
| 0.249 | 29.20036404 | 19.46898106 | 9.40889008 | 0.31600099 | -- |
| 0.250 | 29.08451430 | 19.36123384 | 9.39283966 | 0.32392040 | -- |
| 0.251 | 28.97657887 | 19.26602286 | 9.37218792 | 0.33177213 | -- |
| 0.252 | 28.88163303 | 19.19023016 | 9.34486777 | 0.33981930 | -- |
| 0.253 | 28.80389676 | 19.13910553 | 9.30961737 | 0.34829950 | -- |
| 0.254 | 28.74545407 | 19.11486718 | 9.26609444 | 0.35743085 | -- |
| 0.255 | 28.70524009 | 19.11565513 | 9.21492694 | 0.36739360 | -- |
| 0.256 | 28.67895356 | 19.13569705 | 9.15746532 | 0.37832411 | -- |
| 0.257 | 28.65954395 | 19.16587683 | 9.09571648 | 0.39029568 | -- |
| 0.258 | 28.63833143 | 19.19506337 | 9.03214337 | 0.40331011 | -- |
| 0.259 | 28.60654586 | 19.21182831 | 8.96952742 | 0.41725462 | -- |
| 0.260 | 28.55663180 | 19.20608968 | 8.91061847 | 0.43191111 | -- |
| 0.261 | 28.48385787 | 19.17084966 | 8.85803257 | 0.44693035 | -- |
| 0.262 | 28.38690018 | 19.10299821 | 8.81398716 | 0.46187670 | -- |
| 0.263 | 28.26821210 | 19.00385118 | 8.78010339 | 0.47625755 | -- |

|       |             |             |            |            |    |
|-------|-------------|-------------|------------|------------|----|
| 0.264 | 28.13300641 | 18.87842277 | 8.75708101 | 0.48956086 | -- |
| 0.265 | 27.98885008 | 18.73495525 | 8.74467491 | 0.50134428 | -- |
| 0.266 | 27.84398903 | 18.58335570 | 8.74155452 | 0.51126640 | -- |
| 0.267 | 27.70585375 | 18.43362850 | 8.74530971 | 0.51915636 | -- |
| 0.268 | 27.58039599 | 18.29484901 | 8.75260346 | 0.52522296 | -- |
| 0.269 | 27.47131932 | 18.17397974 | 8.75952658 | 0.53011663 | -- |
| 0.270 | 27.37882785 | 18.07524105 | 8.76195959 | 0.53394524 | -- |
| 0.271 | 27.30113685 | 18.00017964 | 8.75602563 | 0.53725983 | -- |
| 0.272 | 27.23436795 | 17.94760250 | 8.73851593 | 0.54059167 | -- |
| 0.273 | 27.17390072 | 17.91434090 | 8.70744709 | 0.54447817 | -- |
| 0.274 | 27.11512801 | 17.89592205 | 8.66216860 | 0.54943907 | -- |
| 0.275 | 27.05402996 | 17.88699383 | 8.60363270 | 0.55585451 | -- |
| 0.276 | 26.98776174 | 17.88219307 | 8.53415829 | 0.56391998 | -- |
| 0.277 | 26.91479664 | 17.87638245 | 8.45734919 | 0.57363592 | -- |
| 0.278 | 26.83483808 | 17.86509919 | 8.37756201 | 0.58480395 | -- |
| 0.279 | 26.74857217 | 17.84471384 | 8.29945490 | 0.59707401 | -- |
| 0.280 | 26.65710118 | 17.81230621 | 8.22751724 | 0.60997354 | -- |
| 0.281 | 26.56176213 | 17.76597450 | 8.16550514 | 0.62298402 | -- |
| 0.282 | 26.46365588 | 17.70458547 | 8.11614851 | 0.63561147 | -- |
| 0.283 | 26.36368706 | 17.62797164 | 8.08095039 | 0.64743157 | -- |
| 0.284 | 26.26253431 | 17.53688944 | 8.06012932 | 0.65815691 | -- |
| 0.285 | 26.16080496 | 17.43294056 | 8.05280917 | 0.66767876 | -- |
| 0.286 | 26.05943038 | 17.31878602 | 8.05723494 | 0.67603126 | -- |
| 0.287 | 25.95979558 | 17.19787982 | 8.07112591 | 0.68343083 | -- |
| 0.288 | 25.86399804 | 17.07457609 | 8.09189591 | 0.69020820 | -- |

|       |             |             |            |            |    |
|-------|-------------|-------------|------------|------------|----|
| 0.289 | 25.77472992 | 16.95363032 | 8.11709487 | 0.69674595 | -- |
| 0.290 | 25.69507654 | 16.84005934 | 8.14435417 | 0.70347362 | -- |
| 0.291 | 25.62809418 | 16.73856967 | 8.17164005 | 0.71076467 | -- |
| 0.292 | 25.57688928 | 16.65389691 | 8.19703057 | 0.71890293 | -- |
| 0.293 | 25.54224002 | 16.58841926 | 8.21874606 | 0.72806035 | -- |
| 0.294 | 25.52320378 | 16.54242007 | 8.23483039 | 0.73896431 | -- |
| 0.295 | 25.51762091 | 16.51488793 | 8.24327564 | 0.75247557 | -- |
| 0.296 | 25.51850116 | 16.50281188 | 8.24190288 | 0.76679980 | -- |
| 0.297 | 25.51823074 | 16.50153061 | 8.22861372 | 0.78109046 | -- |
| 0.298 | 25.50949080 | 16.50525166 | 8.20232953 | 0.79490823 | -- |
| 0.299 | 25.48576892 | 16.50782849 | 8.16295128 | 0.80799174 | -- |
| 0.300 | 25.44005575 | 16.50345469 | 8.10945691 | 0.82016202 | -- |
| 0.301 | 25.36855785 | 16.48746851 | 8.04284591 | 0.83128502 | -- |
| 0.302 | 25.27048556 | 16.45666833 | 7.96564636 | 0.84123633 | -- |
| 0.303 | 25.14826467 | 16.40967987 | 7.88171733 | 0.84994716 | -- |
| 0.304 | 25.00707824 | 16.34670876 | 7.79605759 | 0.85738652 | -- |
| 0.305 | 24.85423145 | 16.26932001 | 7.71434140 | 0.86361332 | -- |
| 0.306 | 24.69774322 | 16.17989482 | 7.64208896 | 0.86874351 | -- |
| 0.307 | 24.54510920 | 16.08111222 | 7.58390904 | 0.87299076 | -- |
| 0.308 | 24.40221071 | 15.97570769 | 7.54268741 | 0.87662677 | -- |
| 0.309 | 24.27252243 | 15.86604132 | 7.51927097 | 0.87993489 | -- |
| 0.310 | 24.15710786 | 15.75427204 | 7.51229985 | 0.88319642 | -- |
| 0.311 | 24.05513823 | 15.64257601 | 7.51857000 | 0.88662406 | -- |
| 0.312 | 23.96459569 | 15.53327376 | 7.53361646 | 0.89035188 | -- |
| 0.313 | 23.88361675 | 15.42932552 | 7.55259660 | 0.89439696 | -- |

|       |             |             |            |            |    |
|-------|-------------|-------------|------------|------------|----|
| 0.314 | 23.81116305 | 15.33415689 | 7.57113588 | 0.89866076 | -- |
| 0.315 | 23.74749688 | 15.25144100 | 7.58599687 | 0.90295313 | -- |
| 0.316 | 23.69432278 | 15.18473257 | 7.59557582 | 0.90700747 | -- |
| 0.317 | 23.65390277 | 15.13650684 | 7.59991815 | 0.91054656 | -- |
| 0.318 | 23.62826189 | 15.10764179 | 7.60041601 | 0.91331129 | -- |
| 0.319 | 23.61797503 | 15.09686659 | 7.59908755 | 0.91512436 | -- |
| 0.320 | 23.62118495 | 15.10041024 | 7.59792146 | 0.91591455 | -- |
| 0.321 | 23.63325682 | 15.11245022 | 7.59804985 | 0.91575039 | -- |
| 0.322 | 23.64707569 | 15.12587008 | 7.59928819 | 0.91483551 | -- |
| 0.323 | 23.65386046 | 15.13331227 | 7.59991428 | 0.91348706 | -- |
| 0.324 | 23.64500773 | 15.12835475 | 7.59689165 | 0.91257629 | -- |
| 0.325 | 23.61261514 | 15.10655433 | 7.58643364 | 0.91243942 | -- |
| 0.326 | 23.55185942 | 15.06620314 | 7.56491187 | 0.91358924 | -- |
| 0.327 | 23.46115577 | 15.00838983 | 7.52952193 | 0.91614910 | -- |
| 0.328 | 23.34271604 | 14.93644627 | 7.47923519 | 0.92001341 | -- |
| 0.329 | 23.20220117 | 14.85525043 | 7.41500190 | 0.92499815 | -- |
| 0.330 | 23.04764030 | 14.76990286 | 7.33996852 | 0.93086935 | -- |
| 0.331 | 22.88801345 | 14.68473871 | 7.25899839 | 0.93739764 | -- |
| 0.332 | 22.73185132 | 14.60264616 | 7.17802003 | 0.94429248 | -- |
| 0.333 | 22.58597907 | 14.52466010 | 7.10309830 | 0.95128200 | -- |
| 0.334 | 22.45513666 | 14.45036057 | 7.03965979 | 0.95810896 | -- |
| 0.335 | 22.34179947 | 14.37851025 | 6.99160826 | 0.96459567 | -- |
| 0.336 | 22.24662686 | 14.30783048 | 6.96100418 | 0.97063438 | -- |
| 0.337 | 22.16930829 | 14.23790583 | 6.94795957 | 0.97623053 | -- |
| 0.338 | 22.10918186 | 14.16967547 | 6.95079061 | 0.98147595 | -- |

|       |             |             |            |            |    |
|-------|-------------|-------------|------------|------------|----|
| 0.339 | 22.06558967 | 14.10524363 | 6.96657763 | 0.98653173 | -- |
| 0.340 | 22.03816406 | 14.04775014 | 6.99161299 | 0.99159661 | -- |
| 0.341 | 22.02628079 | 14.00015998 | 7.02211523 | 0.99685696 | -- |
| 0.342 | 22.02877690 | 13.96467200 | 7.05456498 | 1.00246227 | -- |
| 0.343 | 22.04321488 | 13.94178882 | 7.08594056 | 1.00848532 | -- |
| 0.344 | 22.06566681 | 13.92983963 | 7.11398417 | 1.01491932 | -- |
| 0.345 | 22.09068691 | 13.92525163 | 7.13691702 | 1.02166547 | -- |
| 0.346 | 22.11185346 | 13.92303028 | 7.15347684 | 1.02855701 | -- |
| 0.347 | 22.12252856 | 13.91775842 | 7.16264840 | 1.03538848 | -- |
| 0.348 | 22.11690533 | 13.90458595 | 7.16371153 | 1.04192618 | -- |
| 0.349 | 22.09090991 | 13.88017631 | 7.15613991 | 1.04796231 | -- |
| 0.350 | 22.04293625 | 13.84330751 | 7.13973588 | 1.05331336 | -- |
| 0.351 | 21.97380586 | 13.79465584 | 7.11475433 | 1.05787063 | -- |
| 0.352 | 21.88650600 | 13.73656503 | 7.08188529 | 1.06158804 | -- |
| 0.353 | 21.78558145 | 13.67223813 | 7.04243729 | 1.06449586 | -- |
| 0.354 | 21.67600101 | 13.60474375 | 6.99820370 | 1.06669748 | -- |
| 0.355 | 21.56241074 | 13.53644635 | 6.95128959 | 1.06836472 | -- |
| 0.356 | 21.44862770 | 13.46862377 | 6.90396053 | 1.06976674 | -- |
| 0.357 | 21.33907115 | 13.40135414 | 6.85939886 | 1.07205863 | -- |
| 0.358 | 21.23477751 | 13.33409335 | 6.81955554 | 1.07486886 | -- |
| 0.359 | 21.13533040 | 13.26608931 | 6.78489681 | 1.07806783 | -- |
| 0.360 | 21.04150499 | 13.19715824 | 6.75612468 | 1.08191596 | -- |
| 0.361 | 20.95456924 | 13.12796794 | 6.73355841 | 1.08669888 | -- |
| 0.362 | 20.87643150 | 13.06024337 | 6.71724524 | 1.09255902 | -- |
| 0.363 | 20.80921978 | 12.99638250 | 6.70693716 | 1.09948010 | -- |

|       |             |             |            |            |    |
|-------|-------------|-------------|------------|------------|----|
| 0.364 | 20.75494130 | 12.93907302 | 6.70214718 | 1.10727367 | -- |
| 0.365 | 20.71475396 | 12.89049938 | 6.70218176 | 1.11560934 | -- |
| 0.366 | 20.68851853 | 12.85185676 | 6.70614644 | 1.12404790 | -- |
| 0.367 | 20.67460252 | 12.82299099 | 6.71307192 | 1.13207902 | -- |
| 0.368 | 20.67009932 | 12.80254118 | 6.72188790 | 1.13922404 | -- |
| 0.369 | 20.67099720 | 12.78799054 | 6.73149838 | 1.14507944 | -- |
| 0.370 | 20.67430466 | 12.77752356 | 6.74097097 | 1.14939752 | -- |
| 0.371 | 20.67604369 | 12.76803232 | 6.74949060 | 1.15211934 | -- |
| 0.372 | 20.67245958 | 12.75601572 | 6.75663408 | 1.15341285 | -- |
| 0.373 | 20.66189674 | 12.73958497 | 6.76228319 | 1.15362951 | -- |
| 0.374 | 20.64407949 | 12.71774101 | 6.76666407 | 1.15326833 | -- |
| 0.375 | 20.61934372 | 12.68987883 | 6.77013887 | 1.15291205 | -- |
| 0.376 | 20.58773947 | 12.65519266 | 6.77303072 | 1.15309788 | -- |
| 0.377 | 20.54846951 | 12.61250561 | 6.77527992 | 1.15426999 | -- |
| 0.378 | 20.49969143 | 12.56034855 | 6.77627867 | 1.15666682 | -- |
| 0.379 | 20.43859367 | 12.49720148 | 6.77470953 | 1.16031694 | -- |
| 0.380 | 20.36197594 | 12.42206418 | 6.76858084 | 1.16501319 | -- |
| 0.381 | 20.26741082 | 12.33522845 | 6.75555969 | 1.17036807 | -- |
| 0.382 | 20.15408599 | 12.23873108 | 6.73329563 | 1.17588024 | -- |
| 0.383 | 20.02398436 | 12.13675354 | 6.70008729 | 1.18104731 | -- |
| 0.384 | 19.88199566 | 12.03532439 | 6.65523310 | 1.18542632 | -- |
| 0.385 | 19.73599369 | 11.94162151 | 6.59967883 | 1.18875967 | -- |
| 0.386 | 19.59569734 | 11.86291787 | 6.53593664 | 1.19097402 | -- |
| 0.387 | 19.47146625 | 11.80530324 | 6.46811611 | 1.19222346 | -- |
| 0.389 | 19.30487853 | 11.76460676 | 6.34118228 | 1.19328488 | -- |

|       |             |             |            |            |    |
|-------|-------------|-------------|------------|------------|----|
| 0.390 | 19.27146163 | 11.77882225 | 6.29276159 | 1.19404701 | -- |
| 0.391 | 19.27028598 | 11.80881125 | 6.26001941 | 1.19558014 | -- |
| 0.392 | 19.29554834 | 11.84629768 | 6.24509003 | 1.19823030 | -- |
| 0.393 | 19.33936478 | 11.88227061 | 6.24802333 | 1.20308306 | -- |
| 0.394 | 19.39145179 | 11.90848647 | 6.26682999 | 1.21009689 | -- |
| 0.395 | 19.44104609 | 11.91880607 | 6.29790911 | 1.21825573 | -- |
| 0.396 | 19.47978210 | 11.90988275 | 6.33657485 | 1.22723121 | -- |
| 0.397 | 19.50221126 | 11.88153652 | 6.37784397 | 1.23674013 | -- |
| 0.398 | 19.50596316 | 11.83624616 | 6.41713785 | 1.24651042 | -- |
| 0.399 | 19.49134781 | 11.77835217 | 6.45071155 | 1.25625209 | -- |
| 0.400 | 19.46067877 | 11.71294893 | 6.47601116 | 1.26573295 | -- |
| 0.401 | 19.41723196 | 11.64488572 | 6.49160709 | 1.27480283 | -- |
| 0.402 | 19.36419804 | 11.57787576 | 6.49702892 | 1.28340442 | -- |
| 0.403 | 19.30412586 | 11.51422454 | 6.49246689 | 1.29158720 | -- |
| 0.404 | 19.23846621 | 11.45482761 | 6.47838647 | 1.29943941 | -- |
| 0.405 | 19.16770744 | 11.39955901 | 6.45531117 | 1.30705261 | -- |
| 0.406 | 19.09187712 | 11.34783358 | 6.42379072 | 1.31449110 | -- |
| 0.407 | 19.01118936 | 11.29926450 | 6.38442958 | 1.32175360 | -- |
| 0.408 | 18.92656409 | 11.25397333 | 6.33810882 | 1.32875905 | -- |
| 0.409 | 18.84000295 | 11.21274098 | 6.28620121 | 1.33535608 | -- |
| 0.410 | 18.75458774 | 11.17679793 | 6.23074541 | 1.34135671 | -- |
| 0.411 | 18.67410327 | 11.14739758 | 6.17447531 | 1.34655629 | -- |
| 0.412 | 18.60243109 | 11.12536216 | 6.12062396 | 1.35077781 | -- |
| 0.413 | 18.54282486 | 11.11062424 | 6.07261810 | 1.35391273 | -- |
| 0.414 | 18.49713798 | 11.10190674 | 6.03358373 | 1.35596313 | -- |



|       |             |             |            |            |    |
|-------|-------------|-------------|------------|------------|----|
| 0.415 | 18.46559991 | 11.09690781 | 6.00592628 | 1.35705471 | -- |
| 0.416 | 18.44664932 | 11.09253846 | 5.99092846 | 1.35743463 | -- |
| 0.417 | 18.43732904 | 11.08551122 | 5.98855228 | 1.35747602 | -- |
| 0.418 | 18.43377387 | 11.07290057 | 5.99741839 | 1.35762510 | -- |
| 0.419 | 18.43268495 | 11.05263216 | 6.01585403 | 1.35833761 | -- |
| 0.420 | 18.43100599 | 11.02382046 | 6.04128768 | 1.36002153 | -- |
| 0.421 | 18.42517074 | 10.98687457 | 6.06946865 | 1.36295775 | -- |
| 0.422 | 18.41325297 | 10.94318544 | 6.09697905 | 1.36725048 | -- |
| 0.423 | 18.39424568 | 10.89477766 | 6.12089825 | 1.37278906 | -- |
| 0.424 | 18.36792701 | 10.84384320 | 6.13913788 | 1.37924583 | -- |
| 0.425 | 18.33437396 | 10.79223161 | 6.15041710 | 1.38612479 | -- |
| 0.426 | 18.29374158 | 10.74121152 | 6.15421508 | 1.39282700 | -- |
| 0.427 | 18.24613065 | 10.69141961 | 6.15058893 | 1.39875298 | -- |
| 0.428 | 18.19166163 | 10.64298799 | 6.14001854 | 1.40340482 | -- |
| 0.429 | 18.13061841 | 10.59576787 | 6.12324145 | 1.40647164 | -- |
| 0.430 | 18.06389397 | 10.54972994 | 6.10123560 | 1.40789239 | -- |
| 0.431 | 17.99314120 | 10.50511907 | 6.07521949 | 1.40785240 | -- |
| 0.432 | 17.92098384 | 10.46261992 | 6.04672467 | 1.40675539 | -- |
| 0.433 | 17.85139990 | 10.42318110 | 6.01752720 | 1.40585146 | -- |
| 0.434 | 17.78751525 | 10.38783750 | 5.98966607 | 1.40519070 | -- |
| 0.435 | 17.73264817 | 10.35726616 | 5.96520644 | 1.40534833 | -- |
| 0.436 | 17.68906674 | 10.33153263 | 5.94592690 | 1.40674914 | -- |
| 0.437 | 17.65717853 | 10.30990549 | 5.93300096 | 1.40936173 | -- |
| 0.438 | 17.63541435 | 10.29083765 | 5.92676306 | 1.41283563 | -- |
| 0.439 | 17.62047815 | 10.27228296 | 5.92647343 | 1.41666925 | -- |

|       |             |             |            |            |    |
|-------|-------------|-------------|------------|------------|----|
| 0.440 | 17.60787301 | 10.25199168 | 5.93040061 | 1.42035715 | -- |
| 0.441 | 17.59285503 | 10.22814114 | 5.93603860 | 1.42349468 | -- |
| 0.442 | 17.57130820 | 10.19962028 | 5.94055695 | 1.42591637 | -- |
| 0.443 | 17.54074387 | 10.16646556 | 5.94130143 | 1.42775795 | -- |
| 0.444 | 17.50072737 | 10.12971681 | 5.93633764 | 1.42948127 | -- |
| 0.445 | 17.45303033 | 10.09131191 | 5.92480608 | 1.43177802 | -- |
| 0.446 | 17.40116938 | 10.05355721 | 5.90709859 | 1.43546090 | -- |
| 0.447 | 17.34960300 | 10.01866922 | 5.88471412 | 1.44126469 | -- |
| 0.448 | 17.30273257 | 9.98820482  | 5.85997581 | 1.44970253 | -- |
| 0.449 | 17.26392852 | 9.96275991  | 5.83552993 | 1.46089497 | -- |
| 0.450 | 17.23495772 | 9.94205639  | 5.81376199 | 1.47449617 | -- |
| 0.451 | 17.21562919 | 9.92496206  | 5.79640673 | 1.48971053 | -- |
| 0.452 | 17.20328995 | 9.90919335  | 5.78428189 | 1.50535093 | -- |
| 0.453 | 17.19447836 | 9.89284845  | 5.77721744 | 1.52002893 | -- |
| 0.454 | 17.18527282 | 9.87430922  | 5.77429085 | 1.53236476 | -- |
| 0.455 | 17.17226438 | 9.85264232  | 5.77415829 | 1.54122611 | -- |
| 0.456 | 17.15322431 | 9.82771295  | 5.77542968 | 1.54590570 | -- |
| 0.457 | 17.12755961 | 9.80013735  | 5.77702803 | 1.54626632 | -- |
| 0.458 | 17.09611317 | 9.77095137  | 5.77831672 | 1.54274496 | -- |
| 0.459 | 17.06074287 | 9.74122311  | 5.77912236 | 1.53629917 | -- |
| 0.460 | 17.02354092 | 9.71163148  | 5.77953316 | 1.52825139 | -- |
| 0.461 | 16.98623168 | 9.68235538  | 5.77965019 | 1.52004788 | -- |
| 0.462 | 16.94957575 | 9.65303112  | 5.77924048 | 1.51305304 | -- |
| 0.463 | 16.91317340 | 9.62288575  | 5.77761939 | 1.50833593 | -- |
| 0.464 | 16.87571198 | 9.59114803  | 5.77362553 | 1.50653025 | -- |

|       |             |            |            |            |    |
|-------|-------------|------------|------------|------------|----|
| 0.465 | 16.83530162 | 9.55734471 | 5.76573415 | 1.50775700 | -- |
| 0.466 | 16.79023461 | 9.52160476 | 5.75246204 | 1.51167183 | -- |
| 0.467 | 16.73947253 | 9.48472974 | 5.73268234 | 1.51756543 | -- |
| 0.468 | 16.68313549 | 9.44810818 | 5.70604893 | 1.52451205 | -- |
| 0.469 | 16.62264397 | 9.41345743 | 5.67320219 | 1.53156609 | -- |
| 0.470 | 16.56056735 | 9.38250629 | 5.63579730 | 1.53790057 | -- |
| 0.471 | 16.50009353 | 9.35652333 | 5.59633067 | 1.54292580 | -- |
| 0.472 | 16.44451986 | 9.33610603 | 5.55777794 | 1.54635629 | -- |
| 0.473 | 16.39659347 | 9.32100992 | 5.52313876 | 1.54817950 | -- |
| 0.474 | 16.35810206 | 9.31025992 | 5.49496026 | 1.54861338 | -- |
| 0.475 | 16.32963480 | 9.30234838 | 5.47499782 | 1.54800684 | -- |
| 0.476 | 16.31115904 | 9.29555790 | 5.46404460 | 1.54726294 | -- |
| 0.477 | 16.30184671 | 9.28832100 | 5.46186463 | 1.54736986 | -- |
| 0.478 | 16.29839167 | 9.27949096 | 5.46742690 | 1.54720932 | -- |
| 0.479 | 16.29875755 | 9.26846746 | 5.47914871 | 1.54693312 | -- |
| 0.480 | 16.30127840 | 9.25515455 | 5.49516323 | 1.54683789 | -- |
| 0.481 | 16.30464664 | 9.23986886 | 5.51360361 | 1.54715944 | -- |
| 0.482 | 16.30770588 | 9.22304674 | 5.53274568 | 1.54801849 | -- |
| 0.483 | 16.30926800 | 9.20498757 | 5.55107352 | 1.54943121 | -- |
| 0.484 | 16.30830941 | 9.18571990 | 5.56753530 | 1.55138572 | -- |
| 0.485 | 16.30418203 | 9.16486402 | 5.58184318 | 1.55389347 | -- |
| 0.486 | 16.29483111 | 9.14163414 | 5.59266408 | 1.55701554 | -- |
| 0.487 | 16.27791241 | 9.11505617 | 5.59855530 | 1.56082648 | -- |
| 0.488 | 16.25134197 | 9.08414042 | 5.59836757 | 1.56538728 | -- |
| 0.489 | 16.21360043 | 9.04813190 | 5.59132440 | 1.57071830 | -- |

|       |             |            |            |            |    |
|-------|-------------|------------|------------|------------|----|
| 0.490 | 16.16417034 | 9.00682402 | 5.57715978 | 1.57678238 | -- |
| 0.491 | 16.10366648 | 8.96067022 | 5.55611684 | 1.58350386 | -- |
| 0.492 | 16.03411336 | 8.91091085 | 5.52910464 | 1.59076019 | -- |
| 0.493 | 15.95873626 | 8.85949502 | 5.49754941 | 1.59840053 | -- |
| 0.494 | 15.88158981 | 8.80891273 | 5.46318754 | 1.60624966 | -- |
| 0.495 | 15.80714438 | 8.76194038 | 5.42790242 | 1.61411334 | -- |
| 0.496 | 15.73956953 | 8.72121894 | 5.39346149 | 1.62174833 | -- |
| 0.497 | 15.68218294 | 8.68891662 | 5.36131930 | 1.62884634 | -- |
| 0.498 | 15.63701796 | 8.66635666 | 5.33256350 | 1.63502873 | -- |
| 0.499 | 15.60457005 | 8.65376364 | 5.30793490 | 1.63982627 | -- |
| 0.500 | 15.58386103 | 8.65015544 | 5.28791283 | 1.64276573 | -- |
| 0.501 | 15.57265861 | 8.65339594 | 5.27285949 | 1.64339163 | -- |
| 0.502 | 15.56806347 | 8.66053542 | 5.26313411 | 1.64139771 | -- |
| 0.503 | 15.56691749 | 8.66815352 | 5.25907019 | 1.63671470 | -- |
| 0.504 | 15.56640029 | 8.67290200 | 5.26093247 | 1.62960692 | -- |
| 0.505 | 15.56432594 | 8.67198165 | 5.26874331 | 1.62066563 | -- |
| 0.506 | 15.55938101 | 8.66353178 | 5.28209831 | 1.61084255 | -- |
| 0.507 | 15.55103411 | 8.64685598 | 5.30000664 | 1.60129365 | -- |
| 0.508 | 15.53930580 | 8.62236890 | 5.32084868 | 1.59324458 | -- |
| 0.509 | 15.52447771 | 8.59144789 | 5.34244482 | 1.58777951 | -- |
| 0.510 | 15.50670880 | 8.55594571 | 5.36234258 | 1.58565684 | -- |
| 0.511 | 15.48581794 | 8.51786943 | 5.37810222 | 1.58712744 | -- |
| 0.512 | 15.46119369 | 8.47890385 | 5.38772647 | 1.59189006 | -- |
| 0.513 | 15.43192242 | 8.44023830 | 5.38996399 | 1.59909010 | -- |
| 0.514 | 15.39691432 | 8.40241211 | 5.38445159 | 1.60745739 | -- |

|       |             |            |            |            |            |
|-------|-------------|------------|------------|------------|------------|
| 0.515 | 15.35540187 | 8.36553477 | 5.37178418 | 1.61551562 | --         |
| 0.516 | 15.30704575 | 8.32944969 | 5.35321717 | 1.62182310 | --         |
| 0.517 | 15.25225353 | 8.29404491 | 5.33040291 | 1.62524475 | --         |
| 0.518 | 15.19212298 | 8.25945344 | 5.30496066 | 1.62512568 | --         |
| 0.519 | 15.12836062 | 8.22618547 | 5.27814582 | 1.62139888 | 0.00000986 |
| 0.520 | 15.06300143 | 8.19503503 | 5.25062122 | 1.61459065 | 0.00008451 |
| 0.521 | 14.99792320 | 8.16682509 | 5.22249901 | 1.60569072 | 0.00018090 |
| 0.522 | 14.93477550 | 8.14220884 | 5.19350521 | 1.59596982 | 0.00030260 |
| 0.523 | 14.87575887 | 8.12136884 | 5.16328191 | 1.58778172 | 0.00047493 |
| 0.524 | 14.82092927 | 8.10385043 | 5.13186723 | 1.58152739 | 0.00077151 |
| 0.525 | 14.77038188 | 8.08868221 | 5.09987001 | 1.57771914 | 0.00113899 |
| 0.526 | 14.72445857 | 8.07444098 | 5.06871167 | 1.57676950 | 0.00150910 |
| 0.527 | 14.68384024 | 8.05968782 | 5.04048812 | 1.57874628 | 0.00183859 |
| 0.528 | 14.64950199 | 8.04321510 | 5.01762866 | 1.58341618 | 0.00211551 |
| 0.529 | 14.62266661 | 8.02435311 | 5.00245955 | 1.59033085 | 0.00235653 |
| 0.530 | 14.60459464 | 8.00310474 | 4.99663825 | 1.59895524 | 0.00269973 |
| 0.531 | 14.59599182 | 7.97995842 | 5.00071589 | 1.60877588 | 0.00332789 |
| 0.532 | 14.59634101 | 7.95579338 | 5.01384074 | 1.61930656 | 0.00418512 |
| 0.533 | 14.60379564 | 7.93144209 | 5.03381811 | 1.63010428 | 0.00523144 |
| 0.534 | 14.61523813 | 7.90765750 | 5.05734815 | 1.64067868 | 0.00638623 |
| 0.535 | 14.62589537 | 7.88413928 | 5.08059380 | 1.65046922 | 0.00757221 |
| 0.536 | 14.63070998 | 7.86032055 | 5.09976170 | 1.65882640 | 0.00873799 |
| 0.537 | 14.62512979 | 7.83543508 | 5.11178037 | 1.66505276 | 0.00986183 |
| 0.538 | 14.60588538 | 7.80877608 | 5.11473977 | 1.66849190 | 0.01094277 |
| 0.539 | 14.57175132 | 7.78008079 | 5.10814747 | 1.66866261 | 0.01198748 |

|       |             |            |            |            |            |
|-------|-------------|------------|------------|------------|------------|
| 0.540 | 14.52394357 | 7.74983590 | 5.09289948 | 1.66539229 | 0.01299847 |
| 0.541 | 14.46613520 | 7.71937878 | 5.07099088 | 1.65894300 | 0.01405177 |
| 0.542 | 14.40379593 | 7.69071309 | 5.04508479 | 1.65005973 | 0.01520361 |
| 0.543 | 14.34316826 | 7.66617875 | 5.01793728 | 1.63994581 | 0.01639575 |
| 0.544 | 14.29023666 | 7.64787018 | 4.99198860 | 1.63010955 | 0.01756823 |
| 0.545 | 14.24967092 | 7.63713032 | 4.96899915 | 1.62216266 | 0.01867404 |
| 0.546 | 14.22388506 | 7.63406067 | 4.94987334 | 1.61754339 | 0.01968164 |
| 0.547 | 14.21272281 | 7.63741620 | 4.93472459 | 1.61724085 | 0.02057658 |
| 0.548 | 14.21347152 | 7.64468466 | 4.92299163 | 1.62161207 | 0.02136284 |
| 0.549 | 14.22157087 | 7.65259352 | 4.91376160 | 1.63026331 | 0.02206126 |
| 0.550 | 14.23147404 | 7.65767920 | 4.90599505 | 1.64212254 | 0.02270354 |
| 0.551 | 14.23775834 | 7.65704505 | 4.89872766 | 1.65559839 | 0.02332431 |
| 0.552 | 14.23643255 | 7.64887748 | 4.89159322 | 1.66885552 | 0.02395328 |
| 0.553 | 14.22587827 | 7.63278870 | 4.88507950 | 1.68016144 | 0.02460984 |
| 0.554 | 14.20431815 | 7.60986273 | 4.87769892 | 1.68813971 | 0.02530072 |
| 0.555 | 14.17349030 | 7.58230525 | 4.86963809 | 1.69201363 | 0.02615061 |
| 0.556 | 14.13636212 | 7.55289844 | 4.86116072 | 1.69166992 | 0.02719419 |
| 0.557 | 14.09641340 | 7.52438727 | 4.85268663 | 1.68760783 | 0.02824542 |
| 0.558 | 14.05720539 | 7.49886345 | 4.84475013 | 1.68075521 | 0.02930892 |
| 0.559 | 14.02149363 | 7.47736658 | 4.83791574 | 1.67222903 | 0.03041651 |
| 0.560 | 13.99069580 | 7.45973812 | 4.83267870 | 1.66307556 | 0.03160233 |
| 0.561 | 13.96479256 | 7.44479807 | 4.82937624 | 1.65408344 | 0.03290284 |
| 0.562 | 13.94247242 | 7.43067467 | 4.82811137 | 1.64567823 | 0.03435327 |
| 0.563 | 13.92157224 | 7.41537331 | 4.82861503 | 1.63794033 | 0.03597918 |
| 0.564 | 13.89960566 | 7.39722979 | 4.83020812 | 1.63072533 | 0.03778662 |

|       |             |            |            |            |            |
|-------|-------------|------------|------------|------------|------------|
| 0.565 | 13.87444439 | 7.37531974 | 4.83188944 | 1.62384998 | 0.03975974 |
| 0.566 | 13.84476448 | 7.34969141 | 4.83239027 | 1.61724737 | 0.04186230 |
| 0.567 | 13.81045474 | 7.32130986 | 4.83049156 | 1.61110631 | 0.04404465 |
| 0.568 | 13.77261346 | 7.29182867 | 4.82523052 | 1.60588145 | 0.04625260 |
| 0.569 | 13.73339518 | 7.26323212 | 4.81617411 | 1.60221438 | 0.04843797 |
| 0.570 | 13.69556914 | 7.23744146 | 4.80354853 | 1.60074964 | 0.05056737 |
| 0.571 | 13.66198696 | 7.21594465 | 4.78827606 | 1.60193242 | 0.05262779 |
| 0.572 | 13.63515689 | 7.19955884 | 4.77182310 | 1.60597386 | 0.05462720 |
| 0.573 | 13.61894743 | 7.18833957 | 4.75590466 | 1.61448477 | 0.05705130 |
| 0.574 | 13.61127919 | 7.18163918 | 4.74211727 | 1.62458797 | 0.05975273 |
| 0.575 | 13.60983383 | 7.17830288 | 4.73163394 | 1.63423969 | 0.06244614 |
| 0.576 | 13.61209884 | 7.17687829 | 4.72492403 | 1.64196169 | 0.06508986 |
| 0.577 | 13.61521513 | 7.17585924 | 4.72167580 | 1.64671238 | 0.06769337 |
| 0.578 | 13.61633387 | 7.17390520 | 4.72090825 | 1.64797102 | 0.07025765 |
| 0.579 | 13.61303731 | 7.16992742 | 4.72119978 | 1.64586266 | 0.07275428 |
| 0.580 | 13.60379643 | 7.16319073 | 4.72106249 | 1.64114106 | 0.07512363 |
| 0.581 | 13.58815938 | 7.15325517 | 4.71929564 | 1.63506760 | 0.07729002 |
| 0.582 | 13.56669501 | 7.13996640 | 4.71519336 | 1.62913446 | 0.07918470 |
| 0.583 | 13.54077520 | 7.12338409 | 4.70869100 | 1.62475184 | 0.08076818 |
| 0.584 | 13.51218177 | 7.10377947 | 4.70023217 | 1.62297466 | 0.08204712 |
| 0.585 | 13.48261288 | 7.08155892 | 4.69056233 | 1.62428976 | 0.08307805 |
| 0.586 | 13.45337674 | 7.05733964 | 4.68041708 | 1.62855071 | 0.08396202 |
| 0.587 | 13.42504918 | 7.03184822 | 4.67024407 | 1.63503103 | 0.08482885 |
| 0.588 | 13.39754786 | 7.00595123 | 4.66004940 | 1.64264286 | 0.08581480 |
| 0.589 | 13.37020948 | 6.98050178 | 4.64938514 | 1.65020019 | 0.08704121 |

|       |             |            |            |            |            |
|-------|-------------|------------|------------|------------|------------|
| 0.590 | 13.34213723 | 6.95629166 | 4.63748321 | 1.65669894 | 0.08859479 |
| 0.591 | 13.31257241 | 6.93386177 | 4.62359750 | 1.66154904 | 0.09051377 |
| 0.592 | 13.28117530 | 6.91342820 | 4.60726238 | 1.66467340 | 0.09278497 |
| 0.593 | 13.24820705 | 6.89479275 | 4.58857418 | 1.66649267 | 0.09534892 |
| 0.594 | 13.21519890 | 6.87737249 | 4.56828757 | 1.66775935 | 0.09880943 |
| 0.595 | 13.18326523 | 6.86034544 | 4.54776783 | 1.66934983 | 0.10285792 |
| 0.596 | 13.15348241 | 6.84283588 | 4.52873626 | 1.67200380 | 0.10698297 |
| 0.597 | 13.12708464 | 6.82416571 | 4.51290499 | 1.67611395 | 0.11099041 |
| 0.598 | 13.10496624 | 6.80411516 | 4.50161554 | 1.68162588 | 0.11470743 |
| 0.599 | 13.08756709 | 6.78305915 | 4.49553026 | 1.68805472 | 0.11802305 |
| 0.600 | 13.07488006 | 6.76202217 | 4.49449211 | 1.69457357 | 0.12089228 |
| 0.601 | 13.06652183 | 6.74255358 | 4.49753499 | 1.70021209 | 0.12332165 |
| 0.602 | 13.06185030 | 6.72642448 | 4.50310457 | 1.70407677 | 0.12534838 |
| 0.603 | 13.06010127 | 6.71529249 | 4.50936965 | 1.70552858 | 0.12702262 |
| 0.604 | 13.06037189 | 6.71026160 | 4.51455078 | 1.70429335 | 0.12839160 |
| 0.605 | 13.06168704 | 6.71157729 | 4.51725897 | 1.70049462 | 0.12949928 |
| 0.606 | 13.06289571 | 6.71846452 | 4.51661775 | 1.69459544 | 0.13038123 |
| 0.607 | 13.06263178 | 6.72913782 | 4.51232119 | 1.68728526 | 0.13107066 |
| 0.608 | 13.05930403 | 6.74103947 | 4.50453437 | 1.67932519 | 0.13160549 |
| 0.609 | 13.05126896 | 6.75129418 | 4.49371800 | 1.67143439 | 0.13203531 |
| 0.610 | 13.03700909 | 6.75718896 | 4.48042542 | 1.66418680 | 0.13242693 |
| 0.611 | 13.01543961 | 6.75665984 | 4.46515844 | 1.65797340 | 0.13286607 |
| 0.612 | 12.98621528 | 6.74864858 | 4.44831131 | 1.65301426 | 0.13345183 |
| 0.613 | 12.94998681 | 6.73329331 | 4.43020817 | 1.64939144 | 0.13429144 |
| 0.614 | 12.90834219 | 6.71180327 | 4.41115730 | 1.64708050 | 0.13548140 |



|       |             |            |            |            |            |
|-------|-------------|------------|------------|------------|------------|
| 0.615 | 12.86378549 | 6.68621309 | 4.39162002 | 1.64601244 | 0.13710044 |
| 0.616 | 12.81927004 | 6.65891847 | 4.37223281 | 1.64606909 | 0.13918923 |
| 0.617 | 12.77778729 | 6.63219531 | 4.35387235 | 1.64709224 | 0.14174612 |
| 0.618 | 12.74187569 | 6.60778287 | 4.33753586 | 1.64887482 | 0.14478121 |
| 0.619 | 12.71385642 | 6.58665864 | 4.32422897 | 1.65114260 | 0.14890730 |
| 0.620 | 12.69361278 | 6.56904978 | 4.31476830 | 1.65357673 | 0.15328353 |
| 0.621 | 12.67996599 | 6.55386947 | 4.30958060 | 1.65584745 | 0.15772138 |
| 0.622 | 12.67119641 | 6.53990496 | 4.30862545 | 1.65764944 | 0.16206012 |
| 0.623 | 12.66527838 | 6.52581516 | 4.31158496 | 1.65876429 | 0.16615237 |
| 0.624 | 12.66163069 | 6.51051108 | 4.31920483 | 1.65908797 | 0.16986469 |
| 0.625 | 12.65641578 | 6.49342828 | 4.32791471 | 1.65903244 | 0.17308329 |
| 0.626 | 12.64984692 | 6.47464795 | 4.33602614 | 1.66050414 | 0.17572312 |
| 0.627 | 12.63865351 | 6.45487617 | 4.34236714 | 1.66075067 | 0.17773219 |
| 0.628 | 12.62358662 | 6.43524166 | 4.34613555 | 1.66020745 | 0.17910002 |
| 0.629 | 12.60588431 | 6.41702234 | 4.34696925 | 1.65916218 | 0.17986094 |
| 0.630 | 12.58697896 | 6.40135831 | 4.34491753 | 1.65777609 | 0.18009594 |
| 0.631 | 12.56818703 | 6.38900786 | 4.34039957 | 1.65606282 | 0.17992859 |
| 0.632 | 12.55045381 | 6.38017538 | 4.33410301 | 1.65391945 | 0.17951261 |
| 0.633 | 12.53426106 | 6.37449780 | 4.32682923 | 1.65122006 | 0.17901410 |
| 0.634 | 12.51957991 | 6.37110267 | 4.31934171 | 1.64787951 | 0.17859417 |
| 0.635 | 12.50600661 | 6.36880559 | 4.31226286 | 1.64391609 | 0.17838857 |
| 0.636 | 12.49287082 | 6.36632238 | 4.30594874 | 1.63948542 | 0.17849549 |
| 0.637 | 12.47949391 | 6.36250573 | 4.30050708 | 1.63489706 | 0.17896331 |
| 0.638 | 12.46528394 | 6.35655329 | 4.29575636 | 1.63054303 | 0.17979051 |
| 0.639 | 12.44986843 | 6.34810460 | 4.29131308 | 1.62684469 | 0.18092754 |

|       |             |            |            |            |            |
|-------|-------------|------------|------------|------------|------------|
| 0.640 | 12.43313085 | 6.33727860 | 4.28665489 | 1.62417702 | 0.18228896 |
| 0.641 | 12.41523248 | 6.32461838 | 4.28126021 | 1.62279220 | 0.18376658 |
| 0.642 | 12.39652563 | 6.31091732 | 4.27469278 | 1.62280200 | 0.18524937 |
| 0.643 | 12.37748319 | 6.29704928 | 4.26670291 | 1.62415742 | 0.18664108 |
| 0.644 | 12.35863010 | 6.28377185 | 4.25730523 | 1.62668233 | 0.18787573 |
| 0.645 | 12.34041773 | 6.27153114 | 4.24676172 | 1.63015295 | 0.18892461 |
| 0.646 | 12.32321363 | 6.26037748 | 4.23558700 | 1.63430332 | 0.18985864 |
| 0.647 | 12.30859084 | 6.24997452 | 4.22441281 | 1.63891405 | 0.19217507 |
| 0.648 | 12.29464898 | 6.23963367 | 4.21394760 | 1.64380153 | 0.19413583 |
| 0.649 | 12.28104641 | 6.22850535 | 4.20478155 | 1.64882477 | 0.19579738 |
| 0.650 | 12.26744835 | 6.21579156 | 4.19734261 | 1.65384426 | 0.19733183 |
| 0.651 | 12.25349491 | 6.20093230 | 4.19180383 | 1.65869204 | 0.19893208 |
| 0.652 | 12.23889006 | 6.18380066 | 4.18806618 | 1.66313985 | 0.20075504 |
| 0.653 | 12.22349094 | 6.16476170 | 4.18580508 | 1.66691240 | 0.20289253 |
| 0.654 | 12.20732298 | 6.14463949 | 4.18452448 | 1.66968721 | 0.20536479 |
| 0.655 | 12.19068610 | 6.12463148 | 4.18366071 | 1.67116951 | 0.20813364 |
| 0.656 | 12.17398360 | 6.10601412 | 4.18264129 | 1.67114171 | 0.21111611 |
| 0.657 | 12.15771045 | 6.08995671 | 4.18099181 | 1.66951874 | 0.21419677 |
| 0.658 | 12.14223404 | 6.07723553 | 4.17832960 | 1.66640115 | 0.21724718 |
| 0.659 | 12.12776113 | 6.06812605 | 4.17442188 | 1.66207345 | 0.22014421 |
| 0.660 | 12.11414820 | 6.06228638 | 4.16912903 | 1.65696664 | 0.22279175 |
| 0.661 | 12.10098650 | 6.05885365 | 4.16242709 | 1.65160975 | 0.22513590 |
| 0.662 | 12.08766015 | 6.05661182 | 4.15438133 | 1.64653677 | 0.22717529 |
| 0.663 | 12.07345685 | 6.05419153 | 4.14513811 | 1.64221158 | 0.22895602 |
| 0.664 | 12.05774635 | 6.05033489 | 4.13492100 | 1.63895538 | 0.23056179 |

|       |             |            |            |            |            |
|-------|-------------|------------|------------|------------|------------|
| 0.665 | 12.04014068 | 6.04409654 | 4.12403734 | 1.63692220 | 0.23209114 |
| 0.666 | 12.02052510 | 6.03493607 | 4.11285601 | 1.63607864 | 0.23363760 |
| 0.667 | 11.99909538 | 6.02277019 | 4.10177082 | 1.63624672 | 0.23526872 |
| 0.668 | 11.97624657 | 6.00788724 | 4.09114683 | 1.63714443 | 0.23701201 |
| 0.669 | 11.95248820 | 5.99084109 | 4.08126674 | 1.63846536 | 0.23885043 |
| 0.670 | 11.92827643 | 5.97228543 | 4.07226709 | 1.63993366 | 0.24072780 |
| 0.671 | 11.90395700 | 5.95286996 | 4.06411693 | 1.64136100 | 0.24256042 |
| 0.672 | 11.87969589 | 5.93314570 | 4.05659762 | 1.64266924 | 0.24425949 |
| 0.673 | 11.85558455 | 5.91357835 | 4.04936111 | 1.64390682 | 0.24574902 |
| 0.674 | 11.83168800 | 5.89455288 | 4.04199529 | 1.64520621 | 0.24698650 |
| 0.675 | 11.80820426 | 5.87644167 | 4.03412261 | 1.64676824 | 0.24797169 |
| 0.676 | 11.78548484 | 5.85963658 | 4.02545631 | 1.64878907 | 0.24875236 |
| 0.677 | 11.76407500 | 5.84456747 | 4.01588649 | 1.65140415 | 0.24941586 |
| 0.678 | 11.74565303 | 5.83166360 | 4.00549971 | 1.65462933 | 0.25110662 |
| 0.679 | 11.73073502 | 5.82126615 | 3.99454526 | 1.65832159 | 0.25389151 |
| 0.680 | 11.71832536 | 5.81354749 | 3.98339171 | 1.66216496 | 0.25654842 |
| 0.681 | 11.70821493 | 5.80839157 | 3.97246515 | 1.66569296 | 0.25902348 |
| 0.682 | 11.70099355 | 5.80539481 | 3.96218739 | 1.66942936 | 0.26136346 |
| 0.683 | 11.69484819 | 5.80383575 | 3.95292585 | 1.67187989 | 0.26360324 |
| 0.684 | 11.68815402 | 5.80278172 | 3.94492803 | 1.67210262 | 0.26574496 |
| 0.685 | 11.67970991 | 5.80121978 | 3.93838748 | 1.66974904 | 0.26775565 |
| 0.686 | 11.66858956 | 5.79819278 | 3.93336161 | 1.66485049 | 0.26957833 |
| 0.687 | 11.65431564 | 5.79297730 | 3.92981832 | 1.65775170 | 0.27114795 |
| 0.688 | 11.63692218 | 5.78513097 | 3.92764414 | 1.64909621 | 0.27241267 |
| 0.689 | 11.61692905 | 5.77458741 | 3.92660644 | 1.63972661 | 0.27335136 |

|       |             |            |            |            |            |
|-------|-------------|------------|------------|------------|------------|
| 0.690 | 11.59521222 | 5.76159521 | 3.92638936 | 1.63057092 | 0.27398190 |
| 0.691 | 11.57279958 | 5.74664570 | 3.92658776 | 1.62251808 | 0.27436016 |
| 0.692 | 11.55067466 | 5.73035734 | 3.92675236 | 1.61629687 | 0.27457427 |
| 0.693 | 11.52964145 | 5.71339294 | 3.92644279 | 1.61238800 | 0.27472762 |
| 0.694 | 11.51018765 | 5.69632333 | 3.92529490 | 1.61097215 | 0.27492196 |
| 0.695 | 11.49250896 | 5.67960905 | 3.92305738 | 1.61195180 | 0.27524169 |
| 0.696 | 11.47661577 | 5.66359014 | 3.91966643 | 1.61500577 | 0.27574163 |
| 0.697 | 11.46251590 | 5.64846102 | 3.91535404 | 1.61968942 | 0.27644576 |
| 0.698 | 11.45070327 | 5.63434459 | 3.91096982 | 1.62552682 | 0.27734846 |
| 0.699 | 11.44050129 | 5.62129670 | 3.90621561 | 1.63210027 | 0.27842943 |
| 0.700 | 11.43140269 | 5.60932790 | 3.90093182 | 1.63907047 | 0.27966520 |

### Fortran code of the analytical PES

```

!-----
      module para
      implicit none

      integer,parameter :: NL=3,NAmax=20,Ndim=3

      double precision :: Weit(20,20,3),B(20,3)

      double precision :: Emax,Emin,Rmin(3),Rmax(3)

      integer :: NA(3)

      !----- <init Network beg> -----

      !Weights

      DATA Weit(1,1,1) / 0.198504083299D+01/

```

DATA Weit(2,1,1) / -0.210400597083D+01/  
DATA Weit(3,1,1) / 0.108378865973D+00/  
DATA Weit(4,1,1) / -0.116784674135D+01/  
DATA Weit(5,1,1) / -0.186738597314D+01/  
DATA Weit(6,1,1) / 0.127238088895D+01/  
DATA Weit(7,1,1) / 0.383125374157D+01/  
DATA Weit(8,1,1) / 0.354474302513D+00/  
DATA Weit(9,1,1) / 0.539473146258D+00/  
DATA Weit(10,1,1) / -0.302215294661D+00/  
DATA Weit(11,1,1) / 0.219572372888D-01/  
DATA Weit(12,1,1) / 0.820506676505D+00/  
DATA Weit(13,1,1) / -0.226499109109D+01/  
DATA Weit(14,1,1) / -0.219959100762D+01/  
DATA Weit(15,1,1) / 0.211814986083D+01/  
DATA Weit(16,1,1) / -0.934644394238D+00/  
DATA Weit(17,1,1) / -0.731403070152D+01/  
DATA Weit(18,1,1) / 0.110845367294D+01/  
DATA Weit(19,1,1) / 0.418743276523D+01/  
DATA Weit(20,1,1) / -0.138460023730D+01/  
DATA Weit(1,2,1) / 0.107263781710D+01/  
DATA Weit(2,2,1) / 0.411521205862D+01/  
DATA Weit(3,2,1) / 0.393996803478D+00/  
DATA Weit(4,2,1) / -0.140502546677D+01/  
DATA Weit(5,2,1) / 0.706351586309D+01/  
DATA Weit(6,2,1) / -0.392468295462D-01/

DATA Weit(7,2,1) / -0.119242459750D+01/  
DATA Weit(8,2,1) / 0.936100264289D+00/  
DATA Weit(9,2,1) / 0.428343500330D+00/  
DATA Weit(10,2,1) / 0.176250652720D+00/  
DATA Weit(11,2,1) / 0.357049284852D+01/  
DATA Weit(12,2,1) / -0.779247064480D+00/  
DATA Weit(13,2,1) / -0.403040981895D+01/  
DATA Weit(14,2,1) / -0.633634975242D+00/  
DATA Weit(15,2,1) / -0.789177424217D+01/  
DATA Weit(16,2,1) / 0.757010488158D+01/  
DATA Weit(17,2,1) / -0.138362134488D+01/  
DATA Weit(18,2,1) / -0.236714896042D+01/  
DATA Weit(19,2,1) / 0.146849181227D+01/  
DATA Weit(20,2,1) / 0.253089099307D+01/  
DATA Weit(1,3,1) / -0.409370838560D+01/  
DATA Weit(2,3,1) / -0.200608987091D+01/  
DATA Weit(3,3,1) / 0.548547628634D+01/  
DATA Weit(4,3,1) / 0.277828362629D+01/  
DATA Weit(5,3,1) / -0.932851048989D+01/  
DATA Weit(6,3,1) / 0.105158045592D+01/  
DATA Weit(7,3,1) / -0.699452709980D+01/  
DATA Weit(8,3,1) / -0.307733266314D+00/  
DATA Weit(9,3,1) / 0.166524168871D+01/  
DATA Weit(10,3,1) / -0.174465473232D+00/  
DATA Weit(11,3,1) / -0.233386939352D+01/

DATA Weit(12,3,1) / -0.499269627802D+00/  
DATA Weit(13,3,1) / 0.461440049358D+01/  
DATA Weit(14,3,1) / 0.631608673963D+00/  
DATA Weit(15,3,1) / 0.478914941579D+01/  
DATA Weit(16,3,1) / -0.420058943904D+01/  
DATA Weit(17,3,1) / 0.525444082683D+00/  
DATA Weit(18,3,1) / 0.120662775675D+01/  
DATA Weit(19,3,1) / -0.212508463286D+01/  
DATA Weit(20,3,1) / -0.115520258559D+01/  
DATA Weit(1,4,1) / 0.000000000000D+00/  
DATA Weit(2,4,1) / 0.000000000000D+00/  
DATA Weit(3,4,1) / 0.000000000000D+00/  
DATA Weit(4,4,1) / 0.000000000000D+00/  
DATA Weit(5,4,1) / 0.000000000000D+00/  
DATA Weit(6,4,1) / 0.000000000000D+00/  
DATA Weit(7,4,1) / 0.000000000000D+00/  
DATA Weit(8,4,1) / 0.000000000000D+00/  
DATA Weit(9,4,1) / 0.000000000000D+00/  
DATA Weit(10,4,1) / 0.000000000000D+00/  
DATA Weit(11,4,1) / 0.000000000000D+00/  
DATA Weit(12,4,1) / 0.000000000000D+00/  
DATA Weit(13,4,1) / 0.000000000000D+00/  
DATA Weit(14,4,1) / 0.000000000000D+00/  
DATA Weit(15,4,1) / 0.000000000000D+00/  
DATA Weit(16,4,1) / 0.000000000000D+00/

DATA Weit(17,4,1) / 0.000000000000D+00/  
DATA Weit(18,4,1) / 0.000000000000D+00/  
DATA Weit(19,4,1) / 0.000000000000D+00/  
DATA Weit(20,4,1) / 0.000000000000D+00/  
DATA Weit(1,5,1) / 0.000000000000D+00/  
DATA Weit(2,5,1) / 0.000000000000D+00/  
DATA Weit(3,5,1) / 0.000000000000D+00/  
DATA Weit(4,5,1) / 0.000000000000D+00/  
DATA Weit(5,5,1) / 0.000000000000D+00/  
DATA Weit(6,5,1) / 0.000000000000D+00/  
DATA Weit(7,5,1) / 0.000000000000D+00/  
DATA Weit(8,5,1) / 0.000000000000D+00/  
DATA Weit(9,5,1) / 0.000000000000D+00/  
DATA Weit(10,5,1) / 0.000000000000D+00/  
DATA Weit(11,5,1) / 0.000000000000D+00/  
DATA Weit(12,5,1) / 0.000000000000D+00/  
DATA Weit(13,5,1) / 0.000000000000D+00/  
DATA Weit(14,5,1) / 0.000000000000D+00/  
DATA Weit(15,5,1) / 0.000000000000D+00/  
DATA Weit(16,5,1) / 0.000000000000D+00/  
DATA Weit(17,5,1) / 0.000000000000D+00/  
DATA Weit(18,5,1) / 0.000000000000D+00/  
DATA Weit(19,5,1) / 0.000000000000D+00/  
DATA Weit(20,5,1) / 0.000000000000D+00/  
DATA Weit(1,6,1) / 0.000000000000D+00/



DATA Weit(2,6,1) / 0.000000000000D+00/  
DATA Weit(3,6,1) / 0.000000000000D+00/  
DATA Weit(4,6,1) / 0.000000000000D+00/  
DATA Weit(5,6,1) / 0.000000000000D+00/  
DATA Weit(6,6,1) / 0.000000000000D+00/  
DATA Weit(7,6,1) / 0.000000000000D+00/  
DATA Weit(8,6,1) / 0.000000000000D+00/  
DATA Weit(9,6,1) / 0.000000000000D+00/  
DATA Weit(10,6,1) / 0.000000000000D+00/  
DATA Weit(11,6,1) / 0.000000000000D+00/  
DATA Weit(12,6,1) / 0.000000000000D+00/  
DATA Weit(13,6,1) / 0.000000000000D+00/  
DATA Weit(14,6,1) / 0.000000000000D+00/  
DATA Weit(15,6,1) / 0.000000000000D+00/  
DATA Weit(16,6,1) / 0.000000000000D+00/  
DATA Weit(17,6,1) / 0.000000000000D+00/  
DATA Weit(18,6,1) / 0.000000000000D+00/  
DATA Weit(19,6,1) / 0.000000000000D+00/  
DATA Weit(20,6,1) / 0.000000000000D+00/  
DATA Weit(1,7,1) / 0.000000000000D+00/  
DATA Weit(2,7,1) / 0.000000000000D+00/  
DATA Weit(3,7,1) / 0.000000000000D+00/  
DATA Weit(4,7,1) / 0.000000000000D+00/  
DATA Weit(5,7,1) / 0.000000000000D+00/  
DATA Weit(6,7,1) / 0.000000000000D+00/

DATA Weit(7,7,1) / 0.000000000000D+00/  
DATA Weit(8,7,1) / 0.000000000000D+00/  
DATA Weit(9,7,1) / 0.000000000000D+00/  
DATA Weit(10,7,1) / 0.000000000000D+00/  
DATA Weit(11,7,1) / 0.000000000000D+00/  
DATA Weit(12,7,1) / 0.000000000000D+00/  
DATA Weit(13,7,1) / 0.000000000000D+00/  
DATA Weit(14,7,1) / 0.000000000000D+00/  
DATA Weit(15,7,1) / 0.000000000000D+00/  
DATA Weit(16,7,1) / 0.000000000000D+00/  
DATA Weit(17,7,1) / 0.000000000000D+00/  
DATA Weit(18,7,1) / 0.000000000000D+00/  
DATA Weit(19,7,1) / 0.000000000000D+00/  
DATA Weit(20,7,1) / 0.000000000000D+00/  
DATA Weit(1,8,1) / 0.000000000000D+00/  
DATA Weit(2,8,1) / 0.000000000000D+00/  
DATA Weit(3,8,1) / 0.000000000000D+00/  
DATA Weit(4,8,1) / 0.000000000000D+00/  
DATA Weit(5,8,1) / 0.000000000000D+00/  
DATA Weit(6,8,1) / 0.000000000000D+00/  
DATA Weit(7,8,1) / 0.000000000000D+00/  
DATA Weit(8,8,1) / 0.000000000000D+00/  
DATA Weit(9,8,1) / 0.000000000000D+00/  
DATA Weit(10,8,1) / 0.000000000000D+00/  
DATA Weit(11,8,1) / 0.000000000000D+00/

DATA Weit(12,8,1) / 0.000000000000D+00/  
DATA Weit(13,8,1) / 0.000000000000D+00/  
DATA Weit(14,8,1) / 0.000000000000D+00/  
DATA Weit(15,8,1) / 0.000000000000D+00/  
DATA Weit(16,8,1) / 0.000000000000D+00/  
DATA Weit(17,8,1) / 0.000000000000D+00/  
DATA Weit(18,8,1) / 0.000000000000D+00/  
DATA Weit(19,8,1) / 0.000000000000D+00/  
DATA Weit(20,8,1) / 0.000000000000D+00/  
DATA Weit(1,9,1) / 0.000000000000D+00/  
DATA Weit(2,9,1) / 0.000000000000D+00/  
DATA Weit(3,9,1) / 0.000000000000D+00/  
DATA Weit(4,9,1) / 0.000000000000D+00/  
DATA Weit(5,9,1) / 0.000000000000D+00/  
DATA Weit(6,9,1) / 0.000000000000D+00/  
DATA Weit(7,9,1) / 0.000000000000D+00/  
DATA Weit(8,9,1) / 0.000000000000D+00/  
DATA Weit(9,9,1) / 0.000000000000D+00/  
DATA Weit(10,9,1) / 0.000000000000D+00/  
DATA Weit(11,9,1) / 0.000000000000D+00/  
DATA Weit(12,9,1) / 0.000000000000D+00/  
DATA Weit(13,9,1) / 0.000000000000D+00/  
DATA Weit(14,9,1) / 0.000000000000D+00/  
DATA Weit(15,9,1) / 0.000000000000D+00/  
DATA Weit(16,9,1) / 0.000000000000D+00/

DATA Weit(17,9,1) / 0.000000000000D+00/  
DATA Weit(18,9,1) / 0.000000000000D+00/  
DATA Weit(19,9,1) / 0.000000000000D+00/  
DATA Weit(20,9,1) / 0.000000000000D+00/  
DATA Weit(1,10,1) / 0.000000000000D+00/  
DATA Weit(2,10,1) / 0.000000000000D+00/  
DATA Weit(3,10,1) / 0.000000000000D+00/  
DATA Weit(4,10,1) / 0.000000000000D+00/  
DATA Weit(5,10,1) / 0.000000000000D+00/  
DATA Weit(6,10,1) / 0.000000000000D+00/  
DATA Weit(7,10,1) / 0.000000000000D+00/  
DATA Weit(8,10,1) / 0.000000000000D+00/  
DATA Weit(9,10,1) / 0.000000000000D+00/  
DATA Weit(10,10,1) / 0.000000000000D+00/  
DATA Weit(11,10,1) / 0.000000000000D+00/  
DATA Weit(12,10,1) / 0.000000000000D+00/  
DATA Weit(13,10,1) / 0.000000000000D+00/  
DATA Weit(14,10,1) / 0.000000000000D+00/  
DATA Weit(15,10,1) / 0.000000000000D+00/  
DATA Weit(16,10,1) / 0.000000000000D+00/  
DATA Weit(17,10,1) / 0.000000000000D+00/  
DATA Weit(18,10,1) / 0.000000000000D+00/  
DATA Weit(19,10,1) / 0.000000000000D+00/  
DATA Weit(20,10,1) / 0.000000000000D+00/  
DATA Weit(1,11,1) / 0.000000000000D+00/

DATA Weit(2,11,1) / 0.000000000000D+00/  
DATA Weit(3,11,1) / 0.000000000000D+00/  
DATA Weit(4,11,1) / 0.000000000000D+00/  
DATA Weit(5,11,1) / 0.000000000000D+00/  
DATA Weit(6,11,1) / 0.000000000000D+00/  
DATA Weit(7,11,1) / 0.000000000000D+00/  
DATA Weit(8,11,1) / 0.000000000000D+00/  
DATA Weit(9,11,1) / 0.000000000000D+00/  
DATA Weit(10,11,1) / 0.000000000000D+00/  
DATA Weit(11,11,1) / 0.000000000000D+00/  
DATA Weit(12,11,1) / 0.000000000000D+00/  
DATA Weit(13,11,1) / 0.000000000000D+00/  
DATA Weit(14,11,1) / 0.000000000000D+00/  
DATA Weit(15,11,1) / 0.000000000000D+00/  
DATA Weit(16,11,1) / 0.000000000000D+00/  
DATA Weit(17,11,1) / 0.000000000000D+00/  
DATA Weit(18,11,1) / 0.000000000000D+00/  
DATA Weit(19,11,1) / 0.000000000000D+00/  
DATA Weit(20,11,1) / 0.000000000000D+00/  
DATA Weit(1,12,1) / 0.000000000000D+00/  
DATA Weit(2,12,1) / 0.000000000000D+00/  
DATA Weit(3,12,1) / 0.000000000000D+00/  
DATA Weit(4,12,1) / 0.000000000000D+00/  
DATA Weit(5,12,1) / 0.000000000000D+00/  
DATA Weit(6,12,1) / 0.000000000000D+00/

DATA Weit(7,12,1) / 0.000000000000D+00/  
DATA Weit(8,12,1) / 0.000000000000D+00/  
DATA Weit(9,12,1) / 0.000000000000D+00/  
DATA Weit(10,12,1) / 0.000000000000D+00/  
DATA Weit(11,12,1) / 0.000000000000D+00/  
DATA Weit(12,12,1) / 0.000000000000D+00/  
DATA Weit(13,12,1) / 0.000000000000D+00/  
DATA Weit(14,12,1) / 0.000000000000D+00/  
DATA Weit(15,12,1) / 0.000000000000D+00/  
DATA Weit(16,12,1) / 0.000000000000D+00/  
DATA Weit(17,12,1) / 0.000000000000D+00/  
DATA Weit(18,12,1) / 0.000000000000D+00/  
DATA Weit(19,12,1) / 0.000000000000D+00/  
DATA Weit(20,12,1) / 0.000000000000D+00/  
DATA Weit(1,13,1) / 0.000000000000D+00/  
DATA Weit(2,13,1) / 0.000000000000D+00/  
DATA Weit(3,13,1) / 0.000000000000D+00/  
DATA Weit(4,13,1) / 0.000000000000D+00/  
DATA Weit(5,13,1) / 0.000000000000D+00/  
DATA Weit(6,13,1) / 0.000000000000D+00/  
DATA Weit(7,13,1) / 0.000000000000D+00/  
DATA Weit(8,13,1) / 0.000000000000D+00/  
DATA Weit(9,13,1) / 0.000000000000D+00/  
DATA Weit(10,13,1) / 0.000000000000D+00/  
DATA Weit(11,13,1) / 0.000000000000D+00/

DATA Weit(12,13,1) / 0.000000000000D+00/  
DATA Weit(13,13,1) / 0.000000000000D+00/  
DATA Weit(14,13,1) / 0.000000000000D+00/  
DATA Weit(15,13,1) / 0.000000000000D+00/  
DATA Weit(16,13,1) / 0.000000000000D+00/  
DATA Weit(17,13,1) / 0.000000000000D+00/  
DATA Weit(18,13,1) / 0.000000000000D+00/  
DATA Weit(19,13,1) / 0.000000000000D+00/  
DATA Weit(20,13,1) / 0.000000000000D+00/  
DATA Weit(1,14,1) / 0.000000000000D+00/  
DATA Weit(2,14,1) / 0.000000000000D+00/  
DATA Weit(3,14,1) / 0.000000000000D+00/  
DATA Weit(4,14,1) / 0.000000000000D+00/  
DATA Weit(5,14,1) / 0.000000000000D+00/  
DATA Weit(6,14,1) / 0.000000000000D+00/  
DATA Weit(7,14,1) / 0.000000000000D+00/  
DATA Weit(8,14,1) / 0.000000000000D+00/  
DATA Weit(9,14,1) / 0.000000000000D+00/  
DATA Weit(10,14,1) / 0.000000000000D+00/  
DATA Weit(11,14,1) / 0.000000000000D+00/  
DATA Weit(12,14,1) / 0.000000000000D+00/  
DATA Weit(13,14,1) / 0.000000000000D+00/  
DATA Weit(14,14,1) / 0.000000000000D+00/  
DATA Weit(15,14,1) / 0.000000000000D+00/  
DATA Weit(16,14,1) / 0.000000000000D+00/

DATA Weit(17,14,1) / 0.000000000000D+00/  
DATA Weit(18,14,1) / 0.000000000000D+00/  
DATA Weit(19,14,1) / 0.000000000000D+00/  
DATA Weit(20,14,1) / 0.000000000000D+00/  
DATA Weit(1,15,1) / 0.000000000000D+00/  
DATA Weit(2,15,1) / 0.000000000000D+00/  
DATA Weit(3,15,1) / 0.000000000000D+00/  
DATA Weit(4,15,1) / 0.000000000000D+00/  
DATA Weit(5,15,1) / 0.000000000000D+00/  
DATA Weit(6,15,1) / 0.000000000000D+00/  
DATA Weit(7,15,1) / 0.000000000000D+00/  
DATA Weit(8,15,1) / 0.000000000000D+00/  
DATA Weit(9,15,1) / 0.000000000000D+00/  
DATA Weit(10,15,1) / 0.000000000000D+00/  
DATA Weit(11,15,1) / 0.000000000000D+00/  
DATA Weit(12,15,1) / 0.000000000000D+00/  
DATA Weit(13,15,1) / 0.000000000000D+00/  
DATA Weit(14,15,1) / 0.000000000000D+00/  
DATA Weit(15,15,1) / 0.000000000000D+00/  
DATA Weit(16,15,1) / 0.000000000000D+00/  
DATA Weit(17,15,1) / 0.000000000000D+00/  
DATA Weit(18,15,1) / 0.000000000000D+00/  
DATA Weit(19,15,1) / 0.000000000000D+00/  
DATA Weit(20,15,1) / 0.000000000000D+00/  
DATA Weit(1,16,1) / 0.000000000000D+00/



DATA Weit(2,16,1) / 0.000000000000D+00/  
DATA Weit(3,16,1) / 0.000000000000D+00/  
DATA Weit(4,16,1) / 0.000000000000D+00/  
DATA Weit(5,16,1) / 0.000000000000D+00/  
DATA Weit(6,16,1) / 0.000000000000D+00/  
DATA Weit(7,16,1) / 0.000000000000D+00/  
DATA Weit(8,16,1) / 0.000000000000D+00/  
DATA Weit(9,16,1) / 0.000000000000D+00/  
DATA Weit(10,16,1) / 0.000000000000D+00/  
DATA Weit(11,16,1) / 0.000000000000D+00/  
DATA Weit(12,16,1) / 0.000000000000D+00/  
DATA Weit(13,16,1) / 0.000000000000D+00/  
DATA Weit(14,16,1) / 0.000000000000D+00/  
DATA Weit(15,16,1) / 0.000000000000D+00/  
DATA Weit(16,16,1) / 0.000000000000D+00/  
DATA Weit(17,16,1) / 0.000000000000D+00/  
DATA Weit(18,16,1) / 0.000000000000D+00/  
DATA Weit(19,16,1) / 0.000000000000D+00/  
DATA Weit(20,16,1) / 0.000000000000D+00/  
DATA Weit(1,17,1) / 0.000000000000D+00/  
DATA Weit(2,17,1) / 0.000000000000D+00/  
DATA Weit(3,17,1) / 0.000000000000D+00/  
DATA Weit(4,17,1) / 0.000000000000D+00/  
DATA Weit(5,17,1) / 0.000000000000D+00/  
DATA Weit(6,17,1) / 0.000000000000D+00/

DATA Weit(7,17,1) / 0.000000000000D+00/  
DATA Weit(8,17,1) / 0.000000000000D+00/  
DATA Weit(9,17,1) / 0.000000000000D+00/  
DATA Weit(10,17,1) / 0.000000000000D+00/  
DATA Weit(11,17,1) / 0.000000000000D+00/  
DATA Weit(12,17,1) / 0.000000000000D+00/  
DATA Weit(13,17,1) / 0.000000000000D+00/  
DATA Weit(14,17,1) / 0.000000000000D+00/  
DATA Weit(15,17,1) / 0.000000000000D+00/  
DATA Weit(16,17,1) / 0.000000000000D+00/  
DATA Weit(17,17,1) / 0.000000000000D+00/  
DATA Weit(18,17,1) / 0.000000000000D+00/  
DATA Weit(19,17,1) / 0.000000000000D+00/  
DATA Weit(20,17,1) / 0.000000000000D+00/  
DATA Weit(1,18,1) / 0.000000000000D+00/  
DATA Weit(2,18,1) / 0.000000000000D+00/  
DATA Weit(3,18,1) / 0.000000000000D+00/  
DATA Weit(4,18,1) / 0.000000000000D+00/  
DATA Weit(5,18,1) / 0.000000000000D+00/  
DATA Weit(6,18,1) / 0.000000000000D+00/  
DATA Weit(7,18,1) / 0.000000000000D+00/  
DATA Weit(8,18,1) / 0.000000000000D+00/  
DATA Weit(9,18,1) / 0.000000000000D+00/  
DATA Weit(10,18,1) / 0.000000000000D+00/  
DATA Weit(11,18,1) / 0.000000000000D+00/

DATA Weit(12,18,1) / 0.000000000000D+00/  
DATA Weit(13,18,1) / 0.000000000000D+00/  
DATA Weit(14,18,1) / 0.000000000000D+00/  
DATA Weit(15,18,1) / 0.000000000000D+00/  
DATA Weit(16,18,1) / 0.000000000000D+00/  
DATA Weit(17,18,1) / 0.000000000000D+00/  
DATA Weit(18,18,1) / 0.000000000000D+00/  
DATA Weit(19,18,1) / 0.000000000000D+00/  
DATA Weit(20,18,1) / 0.000000000000D+00/  
DATA Weit(1,19,1) / 0.000000000000D+00/  
DATA Weit(2,19,1) / 0.000000000000D+00/  
DATA Weit(3,19,1) / 0.000000000000D+00/  
DATA Weit(4,19,1) / 0.000000000000D+00/  
DATA Weit(5,19,1) / 0.000000000000D+00/  
DATA Weit(6,19,1) / 0.000000000000D+00/  
DATA Weit(7,19,1) / 0.000000000000D+00/  
DATA Weit(8,19,1) / 0.000000000000D+00/  
DATA Weit(9,19,1) / 0.000000000000D+00/  
DATA Weit(10,19,1) / 0.000000000000D+00/  
DATA Weit(11,19,1) / 0.000000000000D+00/  
DATA Weit(12,19,1) / 0.000000000000D+00/  
DATA Weit(13,19,1) / 0.000000000000D+00/  
DATA Weit(14,19,1) / 0.000000000000D+00/  
DATA Weit(15,19,1) / 0.000000000000D+00/  
DATA Weit(16,19,1) / 0.000000000000D+00/

DATA Weit(17,19,1) / 0.000000000000D+00/  
DATA Weit(18,19,1) / 0.000000000000D+00/  
DATA Weit(19,19,1) / 0.000000000000D+00/  
DATA Weit(20,19,1) / 0.000000000000D+00/  
DATA Weit(1,20,1) / 0.000000000000D+00/  
DATA Weit(2,20,1) / 0.000000000000D+00/  
DATA Weit(3,20,1) / 0.000000000000D+00/  
DATA Weit(4,20,1) / 0.000000000000D+00/  
DATA Weit(5,20,1) / 0.000000000000D+00/  
DATA Weit(6,20,1) / 0.000000000000D+00/  
DATA Weit(7,20,1) / 0.000000000000D+00/  
DATA Weit(8,20,1) / 0.000000000000D+00/  
DATA Weit(9,20,1) / 0.000000000000D+00/  
DATA Weit(10,20,1) / 0.000000000000D+00/  
DATA Weit(11,20,1) / 0.000000000000D+00/  
DATA Weit(12,20,1) / 0.000000000000D+00/  
DATA Weit(13,20,1) / 0.000000000000D+00/  
DATA Weit(14,20,1) / 0.000000000000D+00/  
DATA Weit(15,20,1) / 0.000000000000D+00/  
DATA Weit(16,20,1) / 0.000000000000D+00/  
DATA Weit(17,20,1) / 0.000000000000D+00/  
DATA Weit(18,20,1) / 0.000000000000D+00/  
DATA Weit(19,20,1) / 0.000000000000D+00/  
DATA Weit(20,20,1) / 0.000000000000D+00/  
DATA Weit(1,1,2) / -0.915249556182D+00/

DATA Weit(2,1,2) / 0.437134479898D+01/  
DATA Weit(3,1,2) / -0.113711839054D+01/  
DATA Weit(4,1,2) / -0.348035840015D+00/  
DATA Weit(5,1,2) / 0.787585435730D+00/  
DATA Weit(6,1,2) / -0.123636275759D+01/  
DATA Weit(7,1,2) / 0.629458884629D+00/  
DATA Weit(8,1,2) / -0.230075262247D+01/  
DATA Weit(9,1,2) / 0.171159029142D+02/  
DATA Weit(10,1,2) / 0.317116297762D+00/  
DATA Weit(11,1,2) / -0.113140908783D+01/  
DATA Weit(12,1,2) / -0.942007108683D+00/  
DATA Weit(13,1,2) / 0.430958199204D+00/  
DATA Weit(14,1,2) / 0.189944169257D+00/  
DATA Weit(15,1,2) / -0.256999191140D+00/  
DATA Weit(16,1,2) / 0.687085797005D+00/  
DATA Weit(17,1,2) / -0.375028722909D+01/  
DATA Weit(18,1,2) / -0.824899308525D+00/  
DATA Weit(19,1,2) / 0.600414137225D-01/  
DATA Weit(20,1,2) / 0.505735802533D+00/  
DATA Weit(1,2,2) / 0.131965505238D+01/  
DATA Weit(2,2,2) / -0.299978777450D+01/  
DATA Weit(3,2,2) / 0.117386765343D+01/  
DATA Weit(4,2,2) / -0.589186010377D-01/  
DATA Weit(5,2,2) / -0.445229145287D+00/  
DATA Weit(6,2,2) / -0.335719815003D+00/

DATA Weit(7,2,2) / 0.135997713606D+01/  
DATA Weit(8,2,2) / -0.142393916142D+01/  
DATA Weit(9,2,2) / -0.385732740188D+01/  
DATA Weit(10,2,2) / 0.178627973499D+01/  
DATA Weit(11,2,2) / 0.192597347825D+00/  
DATA Weit(12,2,2) / -0.204676618067D+01/  
DATA Weit(13,2,2) / -0.838135458869D+00/  
DATA Weit(14,2,2) / 0.354969732313D+00/  
DATA Weit(15,2,2) / -0.423299995768D+00/  
DATA Weit(16,2,2) / 0.303224721230D+00/  
DATA Weit(17,2,2) / 0.116623587811D+00/  
DATA Weit(18,2,2) / 0.480503667415D+00/  
DATA Weit(19,2,2) / 0.120429309036D+00/  
DATA Weit(20,2,2) / -0.342124751739D+00/  
DATA Weit(1,3,2) / -0.381116520322D+01/  
DATA Weit(2,3,2) / -0.112651454659D+02/  
DATA Weit(3,3,2) / 0.391323584567D+00/  
DATA Weit(4,3,2) / -0.114922753793D+01/  
DATA Weit(5,3,2) / 0.463367148474D-01/  
DATA Weit(6,3,2) / 0.772260073065D+00/  
DATA Weit(7,3,2) / 0.958042982247D+00/  
DATA Weit(8,3,2) / 0.321191879617D+01/  
DATA Weit(9,3,2) / -0.146837420212D+02/  
DATA Weit(10,3,2) / 0.773960379893D+00/  
DATA Weit(11,3,2) / -0.872630916904D+01/

DATA Weit(12,3,2) / 0.359467138466D+01/  
DATA Weit(13,3,2) / -0.609124392654D+00/  
DATA Weit(14,3,2) / -0.143924577689D+00/  
DATA Weit(15,3,2) / 0.226468515532D+00/  
DATA Weit(16,3,2) / -0.228942099429D+00/  
DATA Weit(17,3,2) / -0.180659046958D+00/  
DATA Weit(18,3,2) / 0.696952487771D+00/  
DATA Weit(19,3,2) / 0.907361846381D-01/  
DATA Weit(20,3,2) / 0.971149227640D-01/  
DATA Weit(1,4,2) / -0.366507240827D+01/  
DATA Weit(2,4,2) / -0.482560825633D+01/  
DATA Weit(3,4,2) / 0.155818648113D+01/  
DATA Weit(4,4,2) / -0.213894615213D+01/  
DATA Weit(5,4,2) / -0.335648360594D+01/  
DATA Weit(6,4,2) / 0.117068352867D+01/  
DATA Weit(7,4,2) / -0.132117356106D+01/  
DATA Weit(8,4,2) / 0.262538690825D+01/  
DATA Weit(9,4,2) / -0.911731113116D+01/  
DATA Weit(10,4,2) / -0.176009653384D+01/  
DATA Weit(11,4,2) / -0.948694303938D+00/  
DATA Weit(12,4,2) / 0.245935583296D+01/  
DATA Weit(13,4,2) / -0.165265103028D+01/  
DATA Weit(14,4,2) / -0.170701483331D+01/  
DATA Weit(15,4,2) / -0.520226127470D+00/  
DATA Weit(16,4,2) / -0.529977474756D+00/

DATA Weit(17,4,2) / 0.262818138138D+01/  
DATA Weit(18,4,2) / -0.813863729325D+00/  
DATA Weit(19,4,2) / -0.748228222661D+00/  
DATA Weit(20,4,2) / 0.133923464855D+01/  
DATA Weit(1,5,2) / 0.334293405209D+01/  
DATA Weit(2,5,2) / 0.172644690475D+02/  
DATA Weit(3,5,2) / -0.284184532306D+00/  
DATA Weit(4,5,2) / -0.326146148468D+00/  
DATA Weit(5,5,2) / 0.446843029072D-01/  
DATA Weit(6,5,2) / 0.886268095298D-02/  
DATA Weit(7,5,2) / -0.854496120045D+00/  
DATA Weit(8,5,2) / -0.243591001165D+01/  
DATA Weit(9,5,2) / 0.200818559540D+02/  
DATA Weit(10,5,2) / 0.186352439922D+00/  
DATA Weit(11,5,2) / 0.952975416293D+00/  
DATA Weit(12,5,2) / -0.230052897958D+01/  
DATA Weit(13,5,2) / -0.284531818161D-01/  
DATA Weit(14,5,2) / 0.134463784691D-02/  
DATA Weit(15,5,2) / -0.240439635428D+00/  
DATA Weit(16,5,2) / 0.346445607212D-01/  
DATA Weit(17,5,2) / -0.789536309197D+00/  
DATA Weit(18,5,2) / 0.334213425163D+00/  
DATA Weit(19,5,2) / 0.354784993476D+00/  
DATA Weit(20,5,2) / 0.132301945302D-01/  
DATA Weit(1,6,2) / -0.526193917149D+00/



DATA Weit(2,6,2) / -0.431656532468D+01/  
DATA Weit(3,6,2) / -0.543241607788D+00/  
DATA Weit(4,6,2) / -0.210533569238D+01/  
DATA Weit(5,6,2) / 0.647878673288D+00/  
DATA Weit(6,6,2) / 0.189750983327D+01/  
DATA Weit(7,6,2) / -0.147098916891D+01/  
DATA Weit(8,6,2) / 0.266598547749D+01/  
DATA Weit(9,6,2) / -0.118908417828D+02/  
DATA Weit(10,6,2) / -0.193183903161D+01/  
DATA Weit(11,6,2) / -0.227029107859D+00/  
DATA Weit(12,6,2) / 0.266940889986D+01/  
DATA Weit(13,6,2) / 0.396194212429D+01/  
DATA Weit(14,6,2) / -0.967888954798D+00/  
DATA Weit(15,6,2) / -0.676277160710D+00/  
DATA Weit(16,6,2) / 0.800312421244D+00/  
DATA Weit(17,6,2) / -0.612228416555D+00/  
DATA Weit(18,6,2) / 0.883802705944D-01/  
DATA Weit(19,6,2) / 0.132384565156D+01/  
DATA Weit(20,6,2) / -0.557166808983D+00/  
DATA Weit(1,7,2) / 0.118126022352D+01/  
DATA Weit(2,7,2) / 0.276834441192D+01/  
DATA Weit(3,7,2) / 0.164471042618D+01/  
DATA Weit(4,7,2) / -0.261019295268D+00/  
DATA Weit(5,7,2) / 0.237376888014D+00/  
DATA Weit(6,7,2) / -0.182139696868D+00/

DATA Weit(7,7,2) / -0.169620904860D+01/  
DATA Weit(8,7,2) / -0.178302983639D+01/  
DATA Weit(9,7,2) / 0.187302816366D+01/  
DATA Weit(10,7,2) / -0.200314329160D+01/  
DATA Weit(11,7,2) / 0.204154572084D+01/  
DATA Weit(12,7,2) / -0.259420598176D+01/  
DATA Weit(13,7,2) / -0.238155141725D+00/  
DATA Weit(14,7,2) / -0.566230515606D-01/  
DATA Weit(15,7,2) / -0.622358106592D-01/  
DATA Weit(16,7,2) / 0.112463498104D+00/  
DATA Weit(17,7,2) / 0.237458570044D+01/  
DATA Weit(18,7,2) / 0.175322540235D+00/  
DATA Weit(19,7,2) / 0.857433934700D-01/  
DATA Weit(20,7,2) / 0.152025747566D+00/  
DATA Weit(1,8,2) / -0.267621727038D+01/  
DATA Weit(2,8,2) / -0.560017810134D+01/  
DATA Weit(3,8,2) / 0.318580233688D+01/  
DATA Weit(4,8,2) / 0.177909083064D+01/  
DATA Weit(5,8,2) / 0.366705216597D+00/  
DATA Weit(6,8,2) / 0.546021390663D-01/  
DATA Weit(7,8,2) / -0.194888925477D+00/  
DATA Weit(8,8,2) / 0.197246163572D+01/  
DATA Weit(9,8,2) / -0.102534603067D+02/  
DATA Weit(10,8,2) / -0.560441155181D+00/  
DATA Weit(11,8,2) / -0.119255615831D+01/

DATA Weit(12,8,2) / 0.596980607633D+00/  
DATA Weit(13,8,2) / 0.535138544725D+00/  
DATA Weit(14,8,2) / 0.165887197479D+01/  
DATA Weit(15,8,2) / 0.731019395732D+00/  
DATA Weit(16,8,2) / -0.154458924806D+01/  
DATA Weit(17,8,2) / -0.104950941017D+01/  
DATA Weit(18,8,2) / -0.525103008148D+00/  
DATA Weit(19,8,2) / -0.111409135727D+01/  
DATA Weit(20,8,2) / 0.911355943562D+00/  
DATA Weit(1,9,2) / 0.213165233175D+01/  
DATA Weit(2,9,2) / 0.224065850150D+01/  
DATA Weit(3,9,2) / -0.179019105090D+01/  
DATA Weit(4,9,2) / -0.678550782515D+00/  
DATA Weit(5,9,2) / -0.271978208414D+00/  
DATA Weit(6,9,2) / 0.940065576322D+00/  
DATA Weit(7,9,2) / 0.376256736648D-01/  
DATA Weit(8,9,2) / -0.204139933980D+01/  
DATA Weit(9,9,2) / 0.113737777052D+02/  
DATA Weit(10,9,2) / -0.925593124252D+00/  
DATA Weit(11,9,2) / -0.178751186673D+01/  
DATA Weit(12,9,2) / -0.277495320632D+01/  
DATA Weit(13,9,2) / 0.388321981071D+00/  
DATA Weit(14,9,2) / 0.107278703945D+00/  
DATA Weit(15,9,2) / -0.697533348382D+00/  
DATA Weit(16,9,2) / 0.127166266458D+00/

DATA Weit(17,9,2) / 0.519605881123D+00/  
DATA Weit(18,9,2) / -0.803795521261D+00/  
DATA Weit(19,9,2) / -0.317081384206D-01/  
DATA Weit(20,9,2) / -0.245771374958D+00/  
DATA Weit(1,10,2) / 0.135925191728D+01/  
DATA Weit(2,10,2) / 0.634041482883D+01/  
DATA Weit(3,10,2) / 0.111703499495D+01/  
DATA Weit(4,10,2) / 0.127699818547D+01/  
DATA Weit(5,10,2) / -0.228410732001D+00/  
DATA Weit(6,10,2) / 0.326038523626D+00/  
DATA Weit(7,10,2) / 0.102518602853D+01/  
DATA Weit(8,10,2) / -0.236329148834D+01/  
DATA Weit(9,10,2) / 0.675517233922D+01/  
DATA Weit(10,10,2) / 0.227421105487D+01/  
DATA Weit(11,10,2) / 0.791920919043D+00/  
DATA Weit(12,10,2) / -0.208145116076D+01/  
DATA Weit(13,10,2) / 0.580775119548D-01/  
DATA Weit(14,10,2) / 0.783303236161D+00/  
DATA Weit(15,10,2) / 0.102618365878D+00/  
DATA Weit(16,10,2) / -0.396951130399D+01/  
DATA Weit(17,10,2) / -0.685128985824D+00/  
DATA Weit(18,10,2) / -0.256163645221D+00/  
DATA Weit(19,10,2) / 0.251265076221D+01/  
DATA Weit(20,10,2) / 0.844353306030D+00/  
DATA Weit(1,11,2) / 0.182489797998D+01/

DATA Weit(2,11,2) / 0.580529056728D+01/  
DATA Weit(3,11,2) / -0.185653639859D+01/  
DATA Weit(4,11,2) / -0.117673868505D+01/  
DATA Weit(5,11,2) / -0.164178039688D+00/  
DATA Weit(6,11,2) / -0.204579081186D+01/  
DATA Weit(7,11,2) / 0.597196538591D+00/  
DATA Weit(8,11,2) / -0.260640375470D+01/  
DATA Weit(9,11,2) / 0.785260200928D+01/  
DATA Weit(10,11,2) / 0.527979978541D+00/  
DATA Weit(11,11,2) / 0.389114699070D+01/  
DATA Weit(12,11,2) / -0.207180760809D+01/  
DATA Weit(13,11,2) / -0.138935531443D+01/  
DATA Weit(14,11,2) / -0.191448079015D+00/  
DATA Weit(15,11,2) / 0.225493519373D+00/  
DATA Weit(16,11,2) / -0.407505112527D+00/  
DATA Weit(17,11,2) / -0.251941260716D+01/  
DATA Weit(18,11,2) / 0.108016585522D+01/  
DATA Weit(19,11,2) / 0.271713579187D+00/  
DATA Weit(20,11,2) / -0.454560007964D+00/  
DATA Weit(1,12,2) / -0.989667238556D+00/  
DATA Weit(2,12,2) / -0.523020128969D+01/  
DATA Weit(3,12,2) / 0.612193167168D+00/  
DATA Weit(4,12,2) / 0.915344606643D+00/  
DATA Weit(5,12,2) / 0.969657962148D+00/  
DATA Weit(6,12,2) / -0.418814549638D+00/

DATA Weit(7,12,2) / -0.146552430079D+01/  
DATA Weit(8,12,2) / 0.922169277477D+00/  
DATA Weit(9,12,2) / -0.878676861536D+01/  
DATA Weit(10,12,2) / -0.346016865041D-01/  
DATA Weit(11,12,2) / 0.125194680515D+00/  
DATA Weit(12,12,2) / 0.385970405518D+01/  
DATA Weit(13,12,2) / -0.139222745966D+01/  
DATA Weit(14,12,2) / 0.102945400823D+01/  
DATA Weit(15,12,2) / -0.364895460259D+00/  
DATA Weit(16,12,2) / -0.938399243258D+00/  
DATA Weit(17,12,2) / -0.561768276584D+00/  
DATA Weit(18,12,2) / 0.206205423934D+01/  
DATA Weit(19,12,2) / -0.321823490773D+00/  
DATA Weit(20,12,2) / -0.828307439644D+00/  
DATA Weit(1,13,2) / -0.330861090533D+01/  
DATA Weit(2,13,2) / -0.537417202110D+01/  
DATA Weit(3,13,2) / 0.250938927263D+00/  
DATA Weit(4,13,2) / -0.560972856288D+00/  
DATA Weit(5,13,2) / -0.588460514330D+00/  
DATA Weit(6,13,2) / 0.449519404354D+00/  
DATA Weit(7,13,2) / -0.177836594429D-01/  
DATA Weit(8,13,2) / 0.213379502042D+01/  
DATA Weit(9,13,2) / -0.152552881513D+02/  
DATA Weit(10,13,2) / -0.115450450261D+01/  
DATA Weit(11,13,2) / -0.900727055082D+00/

DATA Weit(12,13,2) / 0.266485748102D+01/  
DATA Weit(13,13,2) / -0.107304193362D+01/  
DATA Weit(14,13,2) / 0.115369101916D-01/  
DATA Weit(15,13,2) / 0.103401023719D+00/  
DATA Weit(16,13,2) / -0.114839499118D+00/  
DATA Weit(17,13,2) / 0.134678422173D+01/  
DATA Weit(18,13,2) / 0.559703155192D-01/  
DATA Weit(19,13,2) / -0.493646853676D+00/  
DATA Weit(20,13,2) / -0.676445344749D+00/  
DATA Weit(1,14,2) / 0.224329724537D+01/  
DATA Weit(2,14,2) / -0.658505445920D+01/  
DATA Weit(3,14,2) / -0.243482754072D+01/  
DATA Weit(4,14,2) / -0.341970037164D+00/  
DATA Weit(5,14,2) / -0.368095245680D+00/  
DATA Weit(6,14,2) / -0.238747093640D+01/  
DATA Weit(7,14,2) / -0.117506275934D+00/  
DATA Weit(8,14,2) / -0.326607539863D+01/  
DATA Weit(9,14,2) / -0.131759063653D+01/  
DATA Weit(10,14,2) / -0.143643744153D+01/  
DATA Weit(11,14,2) / -0.437675676285D+00/  
DATA Weit(12,14,2) / -0.328829766608D+01/  
DATA Weit(13,14,2) / -0.160054415796D+01/  
DATA Weit(14,14,2) / 0.727639488763D+00/  
DATA Weit(15,14,2) / 0.697545784810D+00/  
DATA Weit(16,14,2) / 0.123713613545D+01/

DATA Weit(17,14,2) / 0.274375301568D+00/  
DATA Weit(18,14,2) / -0.237965804854D+00/  
DATA Weit(19,14,2) / 0.195589416906D+01/  
DATA Weit(20,14,2) / -0.557716512046D+00/  
DATA Weit(1,15,2) / 0.581603279731D+00/  
DATA Weit(2,15,2) / 0.103336305817D+01/  
DATA Weit(3,15,2) / -0.100774452073D+00/  
DATA Weit(4,15,2) / 0.689067512292D-01/  
DATA Weit(5,15,2) / 0.801096779884D-01/  
DATA Weit(6,15,2) / 0.212624092825D+00/  
DATA Weit(7,15,2) / 0.319791023126D+00/  
DATA Weit(8,15,2) / 0.322644825180D+00/  
DATA Weit(9,15,2) / 0.198194088527D+01/  
DATA Weit(10,15,2) / -0.212638076882D+00/  
DATA Weit(11,15,2) / -0.497777704134D+01/  
DATA Weit(12,15,2) / 0.944526977103D+00/  
DATA Weit(13,15,2) / -0.117081667430D+00/  
DATA Weit(14,15,2) / -0.141828783545D+00/  
DATA Weit(15,15,2) / -0.123470567284D+00/  
DATA Weit(16,15,2) / 0.186633560380D+00/  
DATA Weit(17,15,2) / -0.145639836889D+01/  
DATA Weit(18,15,2) / 0.103201455488D+01/  
DATA Weit(19,15,2) / 0.286027772420D+00/  
DATA Weit(20,15,2) / 0.148183812279D+00/  
DATA Weit(1,16,2) / 0.159046001757D+01/



DATA Weit(2,16,2) / 0.100984230121D+02/  
DATA Weit(3,16,2) / -0.622771646400D+00/  
DATA Weit(4,16,2) / 0.369303168110D+00/  
DATA Weit(5,16,2) / 0.388185423389D+00/  
DATA Weit(6,16,2) / -0.415632483092D+00/  
DATA Weit(7,16,2) / -0.148406734843D+00/  
DATA Weit(8,16,2) / -0.266435170260D+01/  
DATA Weit(9,16,2) / 0.223915568492D+02/  
DATA Weit(10,16,2) / -0.804768140375D+00/  
DATA Weit(11,16,2) / -0.553376033739D+00/  
DATA Weit(12,16,2) / -0.323043664251D+01/  
DATA Weit(13,16,2) / 0.297341919632D+00/  
DATA Weit(14,16,2) / 0.304974066045D-01/  
DATA Weit(15,16,2) / 0.816769552066D+00/  
DATA Weit(16,16,2) / 0.237589188420D+00/  
DATA Weit(17,16,2) / -0.277034935915D+01/  
DATA Weit(18,16,2) / 0.116173985210D+00/  
DATA Weit(19,16,2) / 0.392849659395D+00/  
DATA Weit(20,16,2) / 0.295751626684D+00/  
DATA Weit(1,17,2) / 0.373921263868D+00/  
DATA Weit(2,17,2) / -0.241223154959D+01/  
DATA Weit(3,17,2) / 0.435221358298D+00/  
DATA Weit(4,17,2) / 0.824035160927D+00/  
DATA Weit(5,17,2) / -0.367333210634D+00/  
DATA Weit(6,17,2) / -0.466446215981D+00/

DATA Weit(7,17,2) / 0.113110431134D+01/  
DATA Weit(8,17,2) / 0.889040572806D-01/  
DATA Weit(9,17,2) / -0.136353026380D+01/  
DATA Weit(10,17,2) / -0.605847760913D+00/  
DATA Weit(11,17,2) / -0.541980361293D+00/  
DATA Weit(12,17,2) / 0.116153401037D+00/  
DATA Weit(13,17,2) / 0.267248541271D+00/  
DATA Weit(14,17,2) / -0.101408846172D+00/  
DATA Weit(15,17,2) / -0.291833991718D+00/  
DATA Weit(16,17,2) / -0.482955755876D+00/  
DATA Weit(17,17,2) / 0.148847973313D+01/  
DATA Weit(18,17,2) / -0.760326658726D-01/  
DATA Weit(19,17,2) / 0.390691213041D+00/  
DATA Weit(20,17,2) / -0.225554930848D+00/  
DATA Weit(1,18,2) / 0.191824429736D+01/  
DATA Weit(2,18,2) / 0.192295089625D+01/  
DATA Weit(3,18,2) / 0.491310237624D+00/  
DATA Weit(4,18,2) / -0.175477785334D+01/  
DATA Weit(5,18,2) / 0.450306016428D+00/  
DATA Weit(6,18,2) / -0.217125668140D+01/  
DATA Weit(7,18,2) / 0.742688702243D+00/  
DATA Weit(8,18,2) / 0.752305096956D+00/  
DATA Weit(9,18,2) / 0.155072441641D+01/  
DATA Weit(10,18,2) / -0.168653295857D+01/  
DATA Weit(11,18,2) / 0.317190073385D+01/

DATA Weit(12,18,2) / -0.459706209644D+00/  
DATA Weit(13,18,2) / 0.120260719173D+01/  
DATA Weit(14,18,2) / -0.108079365355D+00/  
DATA Weit(15,18,2) / -0.237654748626D+00/  
DATA Weit(16,18,2) / -0.379729082385D+00/  
DATA Weit(17,18,2) / -0.604899215967D+00/  
DATA Weit(18,18,2) / 0.874424168901D-01/  
DATA Weit(19,18,2) / 0.114574001746D+01/  
DATA Weit(20,18,2) / 0.604970522276D+00/  
DATA Weit(1,19,2) / 0.136269112704D+00/  
DATA Weit(2,19,2) / -0.350161927315D+01/  
DATA Weit(3,19,2) / -0.157827934631D+01/  
DATA Weit(4,19,2) / 0.626724646465D+00/  
DATA Weit(5,19,2) / 0.169590010156D+00/  
DATA Weit(6,19,2) / -0.567542316679D+00/  
DATA Weit(7,19,2) / -0.225312097680D+01/  
DATA Weit(8,19,2) / 0.680357175332D+00/  
DATA Weit(9,19,2) / -0.101378744385D+02/  
DATA Weit(10,19,2) / -0.220200112806D+01/  
DATA Weit(11,19,2) / -0.254234387219D+01/  
DATA Weit(12,19,2) / 0.886482916341D+00/  
DATA Weit(13,19,2) / 0.300260784669D-01/  
DATA Weit(14,19,2) / 0.930172151050D-01/  
DATA Weit(15,19,2) / -0.537980012247D+00/  
DATA Weit(16,19,2) / 0.545728352350D-01/

DATA Weit(17,19,2) / -0.657645941645D-01/  
DATA Weit(18,19,2) / 0.104049207349D+00/  
DATA Weit(19,19,2) / 0.103777867104D+01/  
DATA Weit(20,19,2) / 0.100685700417D+00/  
DATA Weit(1,20,2) / -0.904191187801D-01/  
DATA Weit(2,20,2) / -0.409166878505D-01/  
DATA Weit(3,20,2) / 0.151456460859D+01/  
DATA Weit(4,20,2) / 0.627820791456D+00/  
DATA Weit(5,20,2) / 0.617852642353D+00/  
DATA Weit(6,20,2) / -0.242892907340D+01/  
DATA Weit(7,20,2) / 0.704679182804D+00/  
DATA Weit(8,20,2) / 0.115042520402D+01/  
DATA Weit(9,20,2) / 0.841176190851D+00/  
DATA Weit(10,20,2) / 0.190959293492D+00/  
DATA Weit(11,20,2) / 0.157216391835D+01/  
DATA Weit(12,20,2) / 0.160084613738D+01/  
DATA Weit(13,20,2) / 0.277690702026D+01/  
DATA Weit(14,20,2) / -0.135918549475D+00/  
DATA Weit(15,20,2) / 0.241537203307D+01/  
DATA Weit(16,20,2) / 0.504709154332D+00/  
DATA Weit(17,20,2) / 0.419081758670D+01/  
DATA Weit(18,20,2) / -0.780822914973D+00/  
DATA Weit(19,20,2) / 0.153352238751D+01/  
DATA Weit(20,20,2) / 0.692012794598D+00/  
DATA Weit(1,1,3) / 0.113947491446D+00/

DATA Weit(2,1,3) / 0.000000000000D+00/  
DATA Weit(3,1,3) / 0.000000000000D+00/  
DATA Weit(4,1,3) / 0.000000000000D+00/  
DATA Weit(5,1,3) / 0.000000000000D+00/  
DATA Weit(6,1,3) / 0.000000000000D+00/  
DATA Weit(7,1,3) / 0.000000000000D+00/  
DATA Weit(8,1,3) / 0.000000000000D+00/  
DATA Weit(9,1,3) / 0.000000000000D+00/  
DATA Weit(10,1,3) / 0.000000000000D+00/  
DATA Weit(11,1,3) / 0.000000000000D+00/  
DATA Weit(12,1,3) / 0.000000000000D+00/  
DATA Weit(13,1,3) / 0.000000000000D+00/  
DATA Weit(14,1,3) / 0.000000000000D+00/  
DATA Weit(15,1,3) / 0.000000000000D+00/  
DATA Weit(16,1,3) / 0.000000000000D+00/  
DATA Weit(17,1,3) / 0.000000000000D+00/  
DATA Weit(18,1,3) / 0.000000000000D+00/  
DATA Weit(19,1,3) / 0.000000000000D+00/  
DATA Weit(20,1,3) / 0.000000000000D+00/  
DATA Weit(1,2,3) / 0.374234588641D+01/  
DATA Weit(2,2,3) / 0.000000000000D+00/  
DATA Weit(3,2,3) / 0.000000000000D+00/  
DATA Weit(4,2,3) / 0.000000000000D+00/  
DATA Weit(5,2,3) / 0.000000000000D+00/  
DATA Weit(6,2,3) / 0.000000000000D+00/

DATA Weit(7,2,3) / 0.000000000000D+00/  
DATA Weit(8,2,3) / 0.000000000000D+00/  
DATA Weit(9,2,3) / 0.000000000000D+00/  
DATA Weit(10,2,3) / 0.000000000000D+00/  
DATA Weit(11,2,3) / 0.000000000000D+00/  
DATA Weit(12,2,3) / 0.000000000000D+00/  
DATA Weit(13,2,3) / 0.000000000000D+00/  
DATA Weit(14,2,3) / 0.000000000000D+00/  
DATA Weit(15,2,3) / 0.000000000000D+00/  
DATA Weit(16,2,3) / 0.000000000000D+00/  
DATA Weit(17,2,3) / 0.000000000000D+00/  
DATA Weit(18,2,3) / 0.000000000000D+00/  
DATA Weit(19,2,3) / 0.000000000000D+00/  
DATA Weit(20,2,3) / 0.000000000000D+00/  
DATA Weit(1,3,3) / -0.218227729554D+00/  
DATA Weit(2,3,3) / 0.000000000000D+00/  
DATA Weit(3,3,3) / 0.000000000000D+00/  
DATA Weit(4,3,3) / 0.000000000000D+00/  
DATA Weit(5,3,3) / 0.000000000000D+00/  
DATA Weit(6,3,3) / 0.000000000000D+00/  
DATA Weit(7,3,3) / 0.000000000000D+00/  
DATA Weit(8,3,3) / 0.000000000000D+00/  
DATA Weit(9,3,3) / 0.000000000000D+00/  
DATA Weit(10,3,3) / 0.000000000000D+00/  
DATA Weit(11,3,3) / 0.000000000000D+00/

DATA Weit(12,3,3) / 0.000000000000D+00/

DATA Weit(13,3,3) / 0.000000000000D+00/

DATA Weit(14,3,3) / 0.000000000000D+00/

DATA Weit(15,3,3) / 0.000000000000D+00/

DATA Weit(16,3,3) / 0.000000000000D+00/

DATA Weit(17,3,3) / 0.000000000000D+00/

DATA Weit(18,3,3) / 0.000000000000D+00/

DATA Weit(19,3,3) / 0.000000000000D+00/

DATA Weit(20,3,3) / 0.000000000000D+00/

DATA Weit(1,4,3) / 0.151635913713D+01/

DATA Weit(2,4,3) / 0.000000000000D+00/

DATA Weit(3,4,3) / 0.000000000000D+00/

DATA Weit(4,4,3) / 0.000000000000D+00/

DATA Weit(5,4,3) / 0.000000000000D+00/

DATA Weit(6,4,3) / 0.000000000000D+00/

DATA Weit(7,4,3) / 0.000000000000D+00/

DATA Weit(8,4,3) / 0.000000000000D+00/

DATA Weit(9,4,3) / 0.000000000000D+00/

DATA Weit(10,4,3) / 0.000000000000D+00/

DATA Weit(11,4,3) / 0.000000000000D+00/

DATA Weit(12,4,3) / 0.000000000000D+00/

DATA Weit(13,4,3) / 0.000000000000D+00/

DATA Weit(14,4,3) / 0.000000000000D+00/

DATA Weit(15,4,3) / 0.000000000000D+00/

DATA Weit(16,4,3) / 0.000000000000D+00/

DATA Weit(17,4,3) / 0.000000000000D+00/  
DATA Weit(18,4,3) / 0.000000000000D+00/  
DATA Weit(19,4,3) / 0.000000000000D+00/  
DATA Weit(20,4,3) / 0.000000000000D+00/  
DATA Weit(1,5,3) / -0.451454131732D+01/  
DATA Weit(2,5,3) / 0.000000000000D+00/  
DATA Weit(3,5,3) / 0.000000000000D+00/  
DATA Weit(4,5,3) / 0.000000000000D+00/  
DATA Weit(5,5,3) / 0.000000000000D+00/  
DATA Weit(6,5,3) / 0.000000000000D+00/  
DATA Weit(7,5,3) / 0.000000000000D+00/  
DATA Weit(8,5,3) / 0.000000000000D+00/  
DATA Weit(9,5,3) / 0.000000000000D+00/  
DATA Weit(10,5,3) / 0.000000000000D+00/  
DATA Weit(11,5,3) / 0.000000000000D+00/  
DATA Weit(12,5,3) / 0.000000000000D+00/  
DATA Weit(13,5,3) / 0.000000000000D+00/  
DATA Weit(14,5,3) / 0.000000000000D+00/  
DATA Weit(15,5,3) / 0.000000000000D+00/  
DATA Weit(16,5,3) / 0.000000000000D+00/  
DATA Weit(17,5,3) / 0.000000000000D+00/  
DATA Weit(18,5,3) / 0.000000000000D+00/  
DATA Weit(19,5,3) / 0.000000000000D+00/  
DATA Weit(20,5,3) / 0.000000000000D+00/  
DATA Weit(1,6,3) / -0.235446156987D+01/



DATA Weit(2,6,3) / 0.000000000000D+00/  
DATA Weit(3,6,3) / 0.000000000000D+00/  
DATA Weit(4,6,3) / 0.000000000000D+00/  
DATA Weit(5,6,3) / 0.000000000000D+00/  
DATA Weit(6,6,3) / 0.000000000000D+00/  
DATA Weit(7,6,3) / 0.000000000000D+00/  
DATA Weit(8,6,3) / 0.000000000000D+00/  
DATA Weit(9,6,3) / 0.000000000000D+00/  
DATA Weit(10,6,3) / 0.000000000000D+00/  
DATA Weit(11,6,3) / 0.000000000000D+00/  
DATA Weit(12,6,3) / 0.000000000000D+00/  
DATA Weit(13,6,3) / 0.000000000000D+00/  
DATA Weit(14,6,3) / 0.000000000000D+00/  
DATA Weit(15,6,3) / 0.000000000000D+00/  
DATA Weit(16,6,3) / 0.000000000000D+00/  
DATA Weit(17,6,3) / 0.000000000000D+00/  
DATA Weit(18,6,3) / 0.000000000000D+00/  
DATA Weit(19,6,3) / 0.000000000000D+00/  
DATA Weit(20,6,3) / 0.000000000000D+00/  
DATA Weit(1,7,3) / 0.989664687469D+00/  
DATA Weit(2,7,3) / 0.000000000000D+00/  
DATA Weit(3,7,3) / 0.000000000000D+00/  
DATA Weit(4,7,3) / 0.000000000000D+00/  
DATA Weit(5,7,3) / 0.000000000000D+00/  
DATA Weit(6,7,3) / 0.000000000000D+00/

DATA Weit(7,7,3) / 0.000000000000D+00/  
DATA Weit(8,7,3) / 0.000000000000D+00/  
DATA Weit(9,7,3) / 0.000000000000D+00/  
DATA Weit(10,7,3) / 0.000000000000D+00/  
DATA Weit(11,7,3) / 0.000000000000D+00/  
DATA Weit(12,7,3) / 0.000000000000D+00/  
DATA Weit(13,7,3) / 0.000000000000D+00/  
DATA Weit(14,7,3) / 0.000000000000D+00/  
DATA Weit(15,7,3) / 0.000000000000D+00/  
DATA Weit(16,7,3) / 0.000000000000D+00/  
DATA Weit(17,7,3) / 0.000000000000D+00/  
DATA Weit(18,7,3) / 0.000000000000D+00/  
DATA Weit(19,7,3) / 0.000000000000D+00/  
DATA Weit(20,7,3) / 0.000000000000D+00/  
DATA Weit(1,8,3) / 0.469378885211D+01/  
DATA Weit(2,8,3) / 0.000000000000D+00/  
DATA Weit(3,8,3) / 0.000000000000D+00/  
DATA Weit(4,8,3) / 0.000000000000D+00/  
DATA Weit(5,8,3) / 0.000000000000D+00/  
DATA Weit(6,8,3) / 0.000000000000D+00/  
DATA Weit(7,8,3) / 0.000000000000D+00/  
DATA Weit(8,8,3) / 0.000000000000D+00/  
DATA Weit(9,8,3) / 0.000000000000D+00/  
DATA Weit(10,8,3) / 0.000000000000D+00/  
DATA Weit(11,8,3) / 0.000000000000D+00/

DATA Weit(12,8,3) / 0.000000000000D+00/  
DATA Weit(13,8,3) / 0.000000000000D+00/  
DATA Weit(14,8,3) / 0.000000000000D+00/  
DATA Weit(15,8,3) / 0.000000000000D+00/  
DATA Weit(16,8,3) / 0.000000000000D+00/  
DATA Weit(17,8,3) / 0.000000000000D+00/  
DATA Weit(18,8,3) / 0.000000000000D+00/  
DATA Weit(19,8,3) / 0.000000000000D+00/  
DATA Weit(20,8,3) / 0.000000000000D+00/  
DATA Weit(1,9,3) / -0.699289631754D+01/  
DATA Weit(2,9,3) / 0.000000000000D+00/  
DATA Weit(3,9,3) / 0.000000000000D+00/  
DATA Weit(4,9,3) / 0.000000000000D+00/  
DATA Weit(5,9,3) / 0.000000000000D+00/  
DATA Weit(6,9,3) / 0.000000000000D+00/  
DATA Weit(7,9,3) / 0.000000000000D+00/  
DATA Weit(8,9,3) / 0.000000000000D+00/  
DATA Weit(9,9,3) / 0.000000000000D+00/  
DATA Weit(10,9,3) / 0.000000000000D+00/  
DATA Weit(11,9,3) / 0.000000000000D+00/  
DATA Weit(12,9,3) / 0.000000000000D+00/  
DATA Weit(13,9,3) / 0.000000000000D+00/  
DATA Weit(14,9,3) / 0.000000000000D+00/  
DATA Weit(15,9,3) / 0.000000000000D+00/  
DATA Weit(16,9,3) / 0.000000000000D+00/

DATA Weit(17,9,3) / 0.000000000000D+00/  
DATA Weit(18,9,3) / 0.000000000000D+00/  
DATA Weit(19,9,3) / 0.000000000000D+00/  
DATA Weit(20,9,3) / 0.000000000000D+00/  
DATA Weit(1,10,3) / -0.502371405099D+00/  
DATA Weit(2,10,3) / 0.000000000000D+00/  
DATA Weit(3,10,3) / 0.000000000000D+00/  
DATA Weit(4,10,3) / 0.000000000000D+00/  
DATA Weit(5,10,3) / 0.000000000000D+00/  
DATA Weit(6,10,3) / 0.000000000000D+00/  
DATA Weit(7,10,3) / 0.000000000000D+00/  
DATA Weit(8,10,3) / 0.000000000000D+00/  
DATA Weit(9,10,3) / 0.000000000000D+00/  
DATA Weit(10,10,3) / 0.000000000000D+00/  
DATA Weit(11,10,3) / 0.000000000000D+00/  
DATA Weit(12,10,3) / 0.000000000000D+00/  
DATA Weit(13,10,3) / 0.000000000000D+00/  
DATA Weit(14,10,3) / 0.000000000000D+00/  
DATA Weit(15,10,3) / 0.000000000000D+00/  
DATA Weit(16,10,3) / 0.000000000000D+00/  
DATA Weit(17,10,3) / 0.000000000000D+00/  
DATA Weit(18,10,3) / 0.000000000000D+00/  
DATA Weit(19,10,3) / 0.000000000000D+00/  
DATA Weit(20,10,3) / 0.000000000000D+00/  
DATA Weit(1,11,3) / -0.555502110063D-01/

DATA Weit(2,11,3) / 0.000000000000D+00/  
DATA Weit(3,11,3) / 0.000000000000D+00/  
DATA Weit(4,11,3) / 0.000000000000D+00/  
DATA Weit(5,11,3) / 0.000000000000D+00/  
DATA Weit(6,11,3) / 0.000000000000D+00/  
DATA Weit(7,11,3) / 0.000000000000D+00/  
DATA Weit(8,11,3) / 0.000000000000D+00/  
DATA Weit(9,11,3) / 0.000000000000D+00/  
DATA Weit(10,11,3) / 0.000000000000D+00/  
DATA Weit(11,11,3) / 0.000000000000D+00/  
DATA Weit(12,11,3) / 0.000000000000D+00/  
DATA Weit(13,11,3) / 0.000000000000D+00/  
DATA Weit(14,11,3) / 0.000000000000D+00/  
DATA Weit(15,11,3) / 0.000000000000D+00/  
DATA Weit(16,11,3) / 0.000000000000D+00/  
DATA Weit(17,11,3) / 0.000000000000D+00/  
DATA Weit(18,11,3) / 0.000000000000D+00/  
DATA Weit(19,11,3) / 0.000000000000D+00/  
DATA Weit(20,11,3) / 0.000000000000D+00/  
DATA Weit(1,12,3) / -0.529614444982D+01/  
DATA Weit(2,12,3) / 0.000000000000D+00/  
DATA Weit(3,12,3) / 0.000000000000D+00/  
DATA Weit(4,12,3) / 0.000000000000D+00/  
DATA Weit(5,12,3) / 0.000000000000D+00/  
DATA Weit(6,12,3) / 0.000000000000D+00/

DATA Weit(7,12,3) / 0.000000000000D+00/  
DATA Weit(8,12,3) / 0.000000000000D+00/  
DATA Weit(9,12,3) / 0.000000000000D+00/  
DATA Weit(10,12,3) / 0.000000000000D+00/  
DATA Weit(11,12,3) / 0.000000000000D+00/  
DATA Weit(12,12,3) / 0.000000000000D+00/  
DATA Weit(13,12,3) / 0.000000000000D+00/  
DATA Weit(14,12,3) / 0.000000000000D+00/  
DATA Weit(15,12,3) / 0.000000000000D+00/  
DATA Weit(16,12,3) / 0.000000000000D+00/  
DATA Weit(17,12,3) / 0.000000000000D+00/  
DATA Weit(18,12,3) / 0.000000000000D+00/  
DATA Weit(19,12,3) / 0.000000000000D+00/  
DATA Weit(20,12,3) / 0.000000000000D+00/  
DATA Weit(1,13,3) / -0.197749353003D+01/  
DATA Weit(2,13,3) / 0.000000000000D+00/  
DATA Weit(3,13,3) / 0.000000000000D+00/  
DATA Weit(4,13,3) / 0.000000000000D+00/  
DATA Weit(5,13,3) / 0.000000000000D+00/  
DATA Weit(6,13,3) / 0.000000000000D+00/  
DATA Weit(7,13,3) / 0.000000000000D+00/  
DATA Weit(8,13,3) / 0.000000000000D+00/  
DATA Weit(9,13,3) / 0.000000000000D+00/  
DATA Weit(10,13,3) / 0.000000000000D+00/  
DATA Weit(11,13,3) / 0.000000000000D+00/

DATA Weit(12,13,3) / 0.000000000000D+00/  
DATA Weit(13,13,3) / 0.000000000000D+00/  
DATA Weit(14,13,3) / 0.000000000000D+00/  
DATA Weit(15,13,3) / 0.000000000000D+00/  
DATA Weit(16,13,3) / 0.000000000000D+00/  
DATA Weit(17,13,3) / 0.000000000000D+00/  
DATA Weit(18,13,3) / 0.000000000000D+00/  
DATA Weit(19,13,3) / 0.000000000000D+00/  
DATA Weit(20,13,3) / 0.000000000000D+00/  
DATA Weit(1,14,3) / 0.551910362712D+01/  
DATA Weit(2,14,3) / 0.000000000000D+00/  
DATA Weit(3,14,3) / 0.000000000000D+00/  
DATA Weit(4,14,3) / 0.000000000000D+00/  
DATA Weit(5,14,3) / 0.000000000000D+00/  
DATA Weit(6,14,3) / 0.000000000000D+00/  
DATA Weit(7,14,3) / 0.000000000000D+00/  
DATA Weit(8,14,3) / 0.000000000000D+00/  
DATA Weit(9,14,3) / 0.000000000000D+00/  
DATA Weit(10,14,3) / 0.000000000000D+00/  
DATA Weit(11,14,3) / 0.000000000000D+00/  
DATA Weit(12,14,3) / 0.000000000000D+00/  
DATA Weit(13,14,3) / 0.000000000000D+00/  
DATA Weit(14,14,3) / 0.000000000000D+00/  
DATA Weit(15,14,3) / 0.000000000000D+00/  
DATA Weit(16,14,3) / 0.000000000000D+00/

DATA Weit(17,14,3) / 0.000000000000D+00/  
DATA Weit(18,14,3) / 0.000000000000D+00/  
DATA Weit(19,14,3) / 0.000000000000D+00/  
DATA Weit(20,14,3) / 0.000000000000D+00/  
DATA Weit(1,15,3) / -0.217816382890D+01/  
DATA Weit(2,15,3) / 0.000000000000D+00/  
DATA Weit(3,15,3) / 0.000000000000D+00/  
DATA Weit(4,15,3) / 0.000000000000D+00/  
DATA Weit(5,15,3) / 0.000000000000D+00/  
DATA Weit(6,15,3) / 0.000000000000D+00/  
DATA Weit(7,15,3) / 0.000000000000D+00/  
DATA Weit(8,15,3) / 0.000000000000D+00/  
DATA Weit(9,15,3) / 0.000000000000D+00/  
DATA Weit(10,15,3) / 0.000000000000D+00/  
DATA Weit(11,15,3) / 0.000000000000D+00/  
DATA Weit(12,15,3) / 0.000000000000D+00/  
DATA Weit(13,15,3) / 0.000000000000D+00/  
DATA Weit(14,15,3) / 0.000000000000D+00/  
DATA Weit(15,15,3) / 0.000000000000D+00/  
DATA Weit(16,15,3) / 0.000000000000D+00/  
DATA Weit(17,15,3) / 0.000000000000D+00/  
DATA Weit(18,15,3) / 0.000000000000D+00/  
DATA Weit(19,15,3) / 0.000000000000D+00/  
DATA Weit(20,15,3) / 0.000000000000D+00/  
DATA Weit(1,16,3) / -0.145081889201D+01/



DATA Weit(2,16,3) / 0.000000000000D+00/  
DATA Weit(3,16,3) / 0.000000000000D+00/  
DATA Weit(4,16,3) / 0.000000000000D+00/  
DATA Weit(5,16,3) / 0.000000000000D+00/  
DATA Weit(6,16,3) / 0.000000000000D+00/  
DATA Weit(7,16,3) / 0.000000000000D+00/  
DATA Weit(8,16,3) / 0.000000000000D+00/  
DATA Weit(9,16,3) / 0.000000000000D+00/  
DATA Weit(10,16,3) / 0.000000000000D+00/  
DATA Weit(11,16,3) / 0.000000000000D+00/  
DATA Weit(12,16,3) / 0.000000000000D+00/  
DATA Weit(13,16,3) / 0.000000000000D+00/  
DATA Weit(14,16,3) / 0.000000000000D+00/  
DATA Weit(15,16,3) / 0.000000000000D+00/  
DATA Weit(16,16,3) / 0.000000000000D+00/  
DATA Weit(17,16,3) / 0.000000000000D+00/  
DATA Weit(18,16,3) / 0.000000000000D+00/  
DATA Weit(19,16,3) / 0.000000000000D+00/  
DATA Weit(20,16,3) / 0.000000000000D+00/  
DATA Weit(1,17,3) / 0.109990266728D+00/  
DATA Weit(2,17,3) / 0.000000000000D+00/  
DATA Weit(3,17,3) / 0.000000000000D+00/  
DATA Weit(4,17,3) / 0.000000000000D+00/  
DATA Weit(5,17,3) / 0.000000000000D+00/  
DATA Weit(6,17,3) / 0.000000000000D+00/

DATA Weit(7,17,3) / 0.000000000000D+00/  
DATA Weit(8,17,3) / 0.000000000000D+00/  
DATA Weit(9,17,3) / 0.000000000000D+00/  
DATA Weit(10,17,3) / 0.000000000000D+00/  
DATA Weit(11,17,3) / 0.000000000000D+00/  
DATA Weit(12,17,3) / 0.000000000000D+00/  
DATA Weit(13,17,3) / 0.000000000000D+00/  
DATA Weit(14,17,3) / 0.000000000000D+00/  
DATA Weit(15,17,3) / 0.000000000000D+00/  
DATA Weit(16,17,3) / 0.000000000000D+00/  
DATA Weit(17,17,3) / 0.000000000000D+00/  
DATA Weit(18,17,3) / 0.000000000000D+00/  
DATA Weit(19,17,3) / 0.000000000000D+00/  
DATA Weit(20,17,3) / 0.000000000000D+00/  
DATA Weit(1,18,3) / 0.453818794088D+00/  
DATA Weit(2,18,3) / 0.000000000000D+00/  
DATA Weit(3,18,3) / 0.000000000000D+00/  
DATA Weit(4,18,3) / 0.000000000000D+00/  
DATA Weit(5,18,3) / 0.000000000000D+00/  
DATA Weit(6,18,3) / 0.000000000000D+00/  
DATA Weit(7,18,3) / 0.000000000000D+00/  
DATA Weit(8,18,3) / 0.000000000000D+00/  
DATA Weit(9,18,3) / 0.000000000000D+00/  
DATA Weit(10,18,3) / 0.000000000000D+00/  
DATA Weit(11,18,3) / 0.000000000000D+00/

DATA Weit(12,18,3) / 0.000000000000D+00/  
DATA Weit(13,18,3) / 0.000000000000D+00/  
DATA Weit(14,18,3) / 0.000000000000D+00/  
DATA Weit(15,18,3) / 0.000000000000D+00/  
DATA Weit(16,18,3) / 0.000000000000D+00/  
DATA Weit(17,18,3) / 0.000000000000D+00/  
DATA Weit(18,18,3) / 0.000000000000D+00/  
DATA Weit(19,18,3) / 0.000000000000D+00/  
DATA Weit(20,18,3) / 0.000000000000D+00/  
DATA Weit(1,19,3) / -0.171240668725D+01/  
DATA Weit(2,19,3) / 0.000000000000D+00/  
DATA Weit(3,19,3) / 0.000000000000D+00/  
DATA Weit(4,19,3) / 0.000000000000D+00/  
DATA Weit(5,19,3) / 0.000000000000D+00/  
DATA Weit(6,19,3) / 0.000000000000D+00/  
DATA Weit(7,19,3) / 0.000000000000D+00/  
DATA Weit(8,19,3) / 0.000000000000D+00/  
DATA Weit(9,19,3) / 0.000000000000D+00/  
DATA Weit(10,19,3) / 0.000000000000D+00/  
DATA Weit(11,19,3) / 0.000000000000D+00/  
DATA Weit(12,19,3) / 0.000000000000D+00/  
DATA Weit(13,19,3) / 0.000000000000D+00/  
DATA Weit(14,19,3) / 0.000000000000D+00/  
DATA Weit(15,19,3) / 0.000000000000D+00/  
DATA Weit(16,19,3) / 0.000000000000D+00/

DATA Weit(17,19,3) / 0.000000000000D+00/  
DATA Weit(18,19,3) / 0.000000000000D+00/  
DATA Weit(19,19,3) / 0.000000000000D+00/  
DATA Weit(20,19,3) / 0.000000000000D+00/  
DATA Weit(1,20,3) / 0.695926470002D+01/  
DATA Weit(2,20,3) / 0.000000000000D+00/  
DATA Weit(3,20,3) / 0.000000000000D+00/  
DATA Weit(4,20,3) / 0.000000000000D+00/  
DATA Weit(5,20,3) / 0.000000000000D+00/  
DATA Weit(6,20,3) / 0.000000000000D+00/  
DATA Weit(7,20,3) / 0.000000000000D+00/  
DATA Weit(8,20,3) / 0.000000000000D+00/  
DATA Weit(9,20,3) / 0.000000000000D+00/  
DATA Weit(10,20,3) / 0.000000000000D+00/  
DATA Weit(11,20,3) / 0.000000000000D+00/  
DATA Weit(12,20,3) / 0.000000000000D+00/  
DATA Weit(13,20,3) / 0.000000000000D+00/  
DATA Weit(14,20,3) / 0.000000000000D+00/  
DATA Weit(15,20,3) / 0.000000000000D+00/  
DATA Weit(16,20,3) / 0.000000000000D+00/  
DATA Weit(17,20,3) / 0.000000000000D+00/  
DATA Weit(18,20,3) / 0.000000000000D+00/  
DATA Weit(19,20,3) / 0.000000000000D+00/  
DATA Weit(20,20,3) / 0.000000000000D+00/

!Bias

DATA B(1,1) / -0.678881866854D+00/

DATA B(2,1) / -0.842120035075D+00/

DATA B(3,1) / 0.543005822679D+01/

DATA B(4,1) / -0.252350222139D+01/

DATA B(5,1) / -0.639978624972D+01/

DATA B(6,1) / -0.551214118113D+01/

DATA B(7,1) / -0.435184067451D+01/

DATA B(8,1) / -0.112889847070D+01/

DATA B(9,1) / -0.754329758734D+00/

DATA B(10,1) / 0.156936276533D+00/

DATA B(11,1) / -0.477260470878D+00/

DATA B(12,1) / -0.276532245392D+01/

DATA B(13,1) / 0.149454941373D+00/

DATA B(14,1) / -0.253295086502D+01/

DATA B(15,1) / 0.116846781476D+01/

DATA B(16,1) / -0.284176924338D+01/

DATA B(17,1) / -0.533918719513D+01/

DATA B(18,1) / 0.195764562334D+01/

DATA B(19,1) / 0.252538972436D+01/

DATA B(20,1) / -0.109058126182D+01/

DATA B(1,2) / 0.120256508778D+01/

DATA B(2,2) / 0.683881956269D+01/

DATA B(3,2) / 0.695392650023D+00/

DATA B(4,2) / 0.111142843003D+01/

DATA B(5,2) / -0.133409396350D+01/  
DATA B(6,2) / -0.372647204922D+00/  
DATA B(7,2) / 0.193291431403D+01/  
DATA B(8,2) / -0.332607191548D+01/  
DATA B(9,2) / 0.116422285177D+02/  
DATA B(10,2) / 0.141699863472D+01/  
DATA B(11,2) / -0.205051650087D+00/  
DATA B(12,2) / -0.323588617263D+01/  
DATA B(13,2) / 0.114283201724D+01/  
DATA B(14,2) / -0.267246391695D+00/  
DATA B(15,2) / 0.194498008489D+01/  
DATA B(16,2) / 0.670816353728D+00/  
DATA B(17,2) / -0.591233864571D+00/  
DATA B(18,2) / 0.222427824801D+00/  
DATA B(19,2) / 0.705062683524D+00/  
DATA B(20,2) / 0.258933232336D+00/  
DATA B(1,3) / 0.937432064599D+00/  
DATA B(2,3) / 0.000000000000D+00/  
DATA B(3,3) / 0.000000000000D+00/  
DATA B(4,3) / 0.000000000000D+00/  
DATA B(5,3) / 0.000000000000D+00/  
DATA B(6,3) / 0.000000000000D+00/  
DATA B(7,3) / 0.000000000000D+00/  
DATA B(8,3) / 0.000000000000D+00/  
DATA B(9,3) / 0.000000000000D+00/

DATA B(10,3) / 0.000000000000D+00/  
DATA B(11,3) / 0.000000000000D+00/  
DATA B(12,3) / 0.000000000000D+00/  
DATA B(13,3) / 0.000000000000D+00/  
DATA B(14,3) / 0.000000000000D+00/  
DATA B(15,3) / 0.000000000000D+00/  
DATA B(16,3) / 0.000000000000D+00/  
DATA B(17,3) / 0.000000000000D+00/  
DATA B(18,3) / 0.000000000000D+00/  
DATA B(19,3) / 0.000000000000D+00/  
DATA B(20,3) / 0.000000000000D+00/

!Number of nodes

DATA NA(1) / 20/  
DATA NA(2) / 20/  
DATA NA(3) / 1/

!Normalize parameter

DATA Emin /-0.205636567030D+00/  
DATA Emax /0.407803432970D+00/  
DATA Rmin(1) / 0.289864902665D-01/  
DATA Rmax(1) / 0.191285052986D+01/  
DATA Rmin(2) / 0.724647511360D-01/  
DATA Rmax(2) / 0.145881936068D+01/  
DATA Rmin(3) / 0.126028218550D-02/

DATA Rmax(3) / 0.530452762651D+00/

!----- <init Network end> -----

end module para

!-----

subroutine pes\_oh2\_3bond(r,v,n)

use para

implicit none

integer,intent(in) :: n

double precision,intent(in) :: r(Ndim,n)

double precision,intent(out) :: v(n)

double precision :: r\_tmp(Ndim,n)

integer i

if(Ndim.ne.3) stop 'Ndim.ne.3'

r\_tmp(1,:)=1.0d0/r(1,:)

r\_tmp(2,:)=1.0d0/r(2,:)+1.0d0/r(3,:)

r\_tmp(3,:)=1.0d0/(r(2,:)\*r(3,:))

call pes\_oh2(r\_tmp,v,n)

do i=1,n

    if(r(1,i).lt.0.9d0.or.r(2,i).lt.1.5d0.or.r(3,i).lt.1.5d0) v(i)=1.0d0

enddo

return

end subroutine pes\_oh2\_3bond

!-----



```

subroutine pes_oh2(r,v,n)

use para

implicit none

integer,intent(in) :: n

double precision,intent(in) :: r(Ndim,n)

double precision,intent(out) :: v(n)

double precision Rnormalize(Ndim,n)

integer i

v=0.0

do i=1,Ndim

    Rnormalize(i,:)=2.0D0*(r(I,:)-Rmin(I))/(Rmax(I)-Rmin(I))-1.0D0

enddo

CALL Y_A(NAmax,NA,NL,Weit,B,Rnormalize,Ndim,N,V)

v=(v+1.0d0)*0.5d0*(Emax-Emin)+Emin

return

end subroutine pes_oh2

```

!-----

```

SUBROUTINE Y_A(NAmax,NA,NL,W,B,Xin,NROWin,Np,Eout)

IMPLICIT REAL*8(A-H,O-Z)

DIMENSION NA(NL),W(NAmax,NAmax,NL),B(NAmax,NL),Xin(NROWin,Np)

DIMENSION A(NAmax,Np,NL),Y(NAmax,Np,NL),Eout(Np)

ALPHA=1.0D0;BETA=0.0D0

CALL DGEMM('N','N',NA(1),Np,NROWin,ALPHA,W,

$  NAmax,Xin,NROWin,BETA,Y,NAmax)

DO I2=1,Np

```

```

      Y(1:NA(1),I2,1)=Y(1:NA(1),I2,1)+B(1:NA(1),1)
ENDDO

DO I2=1,Np

DO I1=1,NA(1)

      A(I1,I2,1)=DTANH(Y(I1,I2,1))

ENDDO;ENDDO

DO I3=2,NL

      CALL DGEMM('N','N',NA(I3),Np,NA(I3-1),ALPHA,W(1,1,I3),
$      NAmax,A(1,1,I3-1),NAmax,BETA,Y(1,1,I3),NAmax)

DO I2=1,Np

      Y(1:NA(I3),I2,I3)=Y(1:NA(I3),I2,I3)+B(1:NA(I3),I3)

DO I1=1,NA(I3)

      A(I1,I2,I3)=DTANH(Y(I1,I2,I3))

ENDDO

ENDDO

ENDDO

Eout=Y(1,1:Np,NL)

RETURN

END SUBROUTINE Y_A

```
